# Supplementary material
Source: ML conference proceedings conference paper supplement (https://proceedings.mlr.press/v139/andino21a.html)
Supplement: Supplementary file 1 [file andino21a-supp.zip]

Archive with 41 entries (40 files):
- learningUnitaryBPs-ICML-FinalVersion/.04-Experiments.tex.swp
- learningUnitaryBPs-ICML-FinalVersion/.04-Experiments.tex.un~
- learningUnitaryBPs-ICML-FinalVersion/00-Abstract.tex
- learningUnitaryBPs-ICML-FinalVersion/01-Introduction.tex
- learningUnitaryBPs-ICML-FinalVersion/02-Preliminaries.tex
- learningUnitaryBPs-ICML-FinalVersion/03-Model.tex
- learningUnitaryBPs-ICML-FinalVersion/04-Experiments.tex
- learningUnitaryBPs-ICML-FinalVersion/04-Experiments.tex~
- learningUnitaryBPs-ICML-FinalVersion/04-GappedLearning.tex
- learningUnitaryBPs-ICML-FinalVersion/05-QuadraticLowerBound.tex
- learningUnitaryBPs-ICML-FinalVersion/06-SparseSets.tex
- learningUnitaryBPs-ICML-FinalVersion/algorithm.sty
- learningUnitaryBPs-ICML-FinalVersion/algorithmic.sty
- learningUnitaryBPs-ICML-FinalVersion/Conclusion.tex
- learningUnitaryBPs-ICML-FinalVersion/fancyhdr.sty
- learningUnitaryBPs-ICML-FinalVersion/icml_numpapers.eps
- learningUnitaryBPs-ICML-FinalVersion/icml_numpapers.pdf
- learningUnitaryBPs-ICML-FinalVersion/icml2021.bst
- learningUnitaryBPs-ICML-FinalVersion/icml2021.sty
- learningUnitaryBPs-ICML-FinalVersion/ijcai21-multiauthor.tex
- learningUnitaryBPs-ICML-FinalVersion/learningBPs.aux
- learningUnitaryBPs-ICML-FinalVersion/learningBPs.bbl
- learningUnitaryBPs-ICML-FinalVersion/learningBPs.bib
- learningUnitaryBPs-ICML-FinalVersion/learningBPs.blg
- learningUnitaryBPs-ICML-FinalVersion/learningBPs.log
- learningUnitaryBPs-ICML-FinalVersion/learningBPs.out
- learningUnitaryBPs-ICML-FinalVersion/learningBPs.pdf
- learningUnitaryBPs-ICML-FinalVersion/learningBPs.tex
- learningUnitaryBPs-ICML-FinalVersion/Makefile
- learningUnitaryBPs-ICML-FinalVersion/middleProofLowerBound.tex
- learningUnitaryBPs-ICML-FinalVersion/named.bst
- learningUnitaryBPs-ICML-FinalVersion/PlotSheets/
- learningUnitaryBPs-ICML-FinalVersion/PlotSheets/imageDescribingPaper.png
- learningUnitaryBPs-ICML-FinalVersion/PlotSheets/imageDescribingPaper.xcf
- learningUnitaryBPs-ICML-FinalVersion/PlotSheets/Time_d_3_mi_10.eps
- learningUnitaryBPs-ICML-FinalVersion/PlotSheets/Time_d_3_mi_10-eps-converted-to.pdf
- learningUnitaryBPs-ICML-FinalVersion/PlotSheets/Time_d_3_mi_10-OLD.pdf
- learningUnitaryBPs-ICML-FinalVersion/pmlr-form.pdf
- learningUnitaryBPs-ICML-FinalVersion/preamble.tex
- learningUnitaryBPs-ICML-FinalVersion/proofTheoremGapped.tex
- learningUnitaryBPs-ICML-FinalVersion/proofTheoremQuadraticLowerBound.tex
