# Supplementary material
Source: ML conference proceedings conference paper supplement (https://proceedings.mlr.press/v139/andino21a.html)
Supplement: Supplementary file 1 [file andino21a-supp.zip › learningUnitaryBPs-ICML-FinalVersion/00-Abstract.tex]

\begin{abstract}
Bounded width branching programs are a formalism that can be used 
to capture the notion of non-uniform constant-space computation. 
In this work, we study a generalized version of bounded width branching programs where 
instructions are defined by unitary matrices of bounded dimension.
We introduce a new learning framework for these branching programs
that leverages on a combination of local search techniques with 
gradient descent over Riemannian manifolds. We also show that gapped, 
read-once branching programs of bounded dimension can be learned with 
a polynomial number of queries in the presence of a teacher. 
Finally, we provide explicit near-quadratic size lower-bounds for
bounded-dimension unitary branching programs, and exponential size 
lower-bounds for bounded-dimension read-once gapped unitary branching programs.
The first lower bound is proven using a combination Ne\v{c}iporuk's lower bound 
technique with classic results from algebraic geometry. The second lower bound 
is proven within the framework of communication complexity theory. \todo{Add comments on Experiments} 
\end{abstract}
