# Supplementary material
Source: ML conference proceedings conference paper supplement (https://proceedings.mlr.press/v139/andino21a.html)
Supplement: Supplementary file 1 [file andino21a-supp.zip › learningUnitaryBPs-ICML-FinalVersion/learningBPs.aux]

\relax 
\providecommand\hyper@newdestlabel[2]{}
\providecommand\HyperFirstAtBeginDocument{\AtBeginDocument}
\HyperFirstAtBeginDocument{\ifx\hyper@anchor\@undefined
\global\let\oldcontentsline\contentsline
\gdef\contentsline#1#2#3#4{\oldcontentsline{#1}{#2}{#3}}
\global\let\oldnewlabel\newlabel
\gdef\newlabel#1#2{\newlabelxx{#1}#2}
\gdef\newlabelxx#1#2#3#4#5#6{\oldnewlabel{#1}{{#2}{#3}}}
\AtEndDocument{\ifx\hyper@anchor\@undefined
\let\contentsline\oldcontentsline
\let\newlabel\oldnewlabel
\fi}
\fi}
\global\let\hyper@last\relax 
\gdef\HyperFirstAtBeginDocument#1{#1}
\providecommand\HyField@AuxAddToFields[1]{}
\providecommand\HyField@AuxAddToCoFields[2]{}
\citation{nakanishi2000ordered,barrington1989bounded,ergun1995learning}
\citation{barrington1989bounded}
\citation{bergadano1997learning,mansour2002boosting,ergun1995learning,rwlm93,bshouty1998learning}
\citation{bedard1993extensions,cleve1991towards,caussinus1996note,barrington1989bounded}
\citation{adams1965complex}
\citation{abrudan2008steepest,abrudan2009conjugate,abrudan2008steepest}
\citation{lelarasmee1982waveform,janssen1997sor,crow1990waveform}
\providecommand \oddpage@label [2]{}
\newlabel{section:Introduction}{{1}{1}{}{section.1}{}}
\citation{barrington1989bounded}
\citation{chiu2001division,beame1986log}
\citation{viola2009power}
\citation{elberfeld2012algorithmic}
\newlabel{section:Preliminaries}{{2}{2}{}{section.2}{}}
\newlabel{equation:ValueBP}{{1}{2}{}{equation.2.1}{}}
\newlabel{unitaryBranchingPrograms}{{2.1}{2}{}{subsection.2.1}{}}
\newlabel{section:Model}{{3}{3}{}{section.3}{}}
\citation{absil2009optimization}
\citation{boumal2014manopt}
\citation{huang2018roptlib}
\newlabel{equation:objectivefunction}{{2}{4}{}{equation.3.2}{}}
\newlabel{equation:leftmultiplication}{{3.2}{5}{}{subsection.3.2}{}}
\newlabel{equation:rightmultiplication}{{3.2}{5}{}{subsection.3.2}{}}
\newlabel{equation:rightmultiplication}{{3.2}{5}{}{subsection.3.2}{}}
\newlabel{observation:SplitMultiplication}{{1}{5}{}{theorem.1}{}}
\newlabel{proposition:FastComputation}{{2}{5}{}{theorem.2}{}}
\citation{FindGolovnevHirschKulikov2015,IwamaMorizumi2002,Lachish2001Explicit}
\citation{Neciporuk1966,TuranVatan1997computation,RoychowdhuryVatan2001quantum}
\citation{Neciporuk1966}
\citation{RoychowdhuryVatan2001quantum}
\citation{deOliveiraOliveira2016Tradeoffs}
\newlabel{proposition:FastComputation}{{3}{6}{}{theorem.3}{}}
\providecommand*\caption@xref[2]{\@setref\relax\@undefined{#1}}
\newlabel{algorithm:learning}{{1}{6}{}{algocf.1}{}}
\citation{angluin1987learning}
\newlabel{equation:ElementDistinctness}{{3}{7}{}{equation.4.3}{}}
\newlabel{theorem:QuadraticLowerBound}{{4}{7}{}{theorem.4}{}}
\newlabel{theorem:Gapped}{{5}{7}{}{theorem.5}{}}
\newlabel{theorem:AngluinUnitary}{{6}{7}{}{theorem.6}{}}
\newlabel{lemma:CommunicationComplexityDFAs}{{7}{7}{}{theorem.7}{}}
\newlabel{lemma:CommunicationComplexityBP}{{8}{7}{}{theorem.8}{}}
\citation{jukna2002triangle}
\citation{huang2018roptlib}
\newlabel{theorem:LowerBound}{{9}{8}{}{theorem.9}{}}
\newlabel{section:Experiments}{{6}{8}{}{section.6}{}}
\newlabel{figure:IterationsDimension}{{1}{8}{Average time in seconds needed to learn a dimension-$3$ unitary branching program consistent with an $n$-dataset up to a given accuracy. For instance, the red line depicts the time necessary to learn such a branching program with at most $20\%$ error. The considered values of $n$ are represented in the horizontal axis, while the time in seconds is depicted in the vertical axis. A number $r$ close to point $(n,t)$ of a given color indicates that the accuracy represented by the color was achieved only for $r$ out of the 10 randomly generated instances of $n$-datasets. In this case, the average is taken with respect to these $r$ instances. No number close to such a point $(n,t)$ indicates that the corresponding accuracy was obtained on all 10 $n$-datasets. For instance, for all but two of the $1024$-datasets our program was able to learn a completely consistent ($0\%$ error) dimension-$3$ unitary branching program.\relax }{figure.caption.2}{}}
\bibdata{learningBPs}
\bibcite{abrudan2009conjugate}{{1}{2009}{{Abrudan et~al.}}{{Abrudan, Eriksson, and Koivunen}}}
\bibcite{abrudan2008steepest}{{2}{2008}{{Abrudan et~al.}}{{Abrudan, Eriksson, and Koivunen}}}
\bibcite{absil2009optimization}{{3}{2009}{{Absil et~al.}}{{Absil, Mahony, and Sepulchre}}}
\bibcite{adams1965complex}{{4}{1965}{{Adams \& Walker}}{{Adams and Walker}}}
\bibcite{angluin1987learning}{{5}{1987}{{Angluin}}{{}}}
\bibcite{barrington1989bounded}{{6}{1989}{{Barrington}}{{}}}
\bibcite{beame1986log}{{7}{1986}{{Beame et~al.}}{{Beame, Cook, and Hoover}}}
\bibcite{bedard1993extensions}{{8}{1993}{{B{\'e}dard et~al.}}{{B{\'e}dard, Lemieux, and McKenzie}}}
\bibcite{bergadano1997learning}{{9}{1997}{{Bergadano et~al.}}{{Bergadano, Bshouty, Tamon, and Varricchio}}}
\bibcite{boumal2014manopt}{{10}{2014}{{Boumal et~al.}}{{Boumal, Mishra, Absil, and Sepulchre}}}
\bibcite{bshouty1998learning}{{11}{1998}{{Bshouty et~al.}}{{Bshouty, Tamon, and Wilson}}}
\bibcite{caussinus1996note}{{12}{1996}{{Caussinus}}{{}}}
\bibcite{chiu2001division}{{13}{2001}{{Chiu et~al.}}{{Chiu, Davida, and Litow}}}
\bibcite{cleve1991towards}{{14}{1991}{{Cleve}}{{}}}
\bibcite{crow1990waveform}{{15}{1990}{{Crow \& Ilic}}{{Crow and Ilic}}}
\bibcite{deOliveiraOliveira2016Tradeoffs}{{16}{2016}{{de~Oliveira~Oliveira}}{{}}}
\bibcite{elberfeld2012algorithmic}{{17}{2012}{{Elberfeld et~al.}}{{Elberfeld, Jakoby, and Tantau}}}
\bibcite{ergun1995learning}{{18}{1995}{{Erg{\"u}n et~al.}}{{Erg{\"u}n, Kumar, and Rubinfeld}}}
\bibcite{FindGolovnevHirschKulikov2015}{{19}{2015}{{Find et~al.}}{{Find, Golovnev, Hirsch, and Kulikov}}}
\bibcite{huang2018roptlib}{{20}{2018}{{Huang et~al.}}{{Huang, Absil, Gallivan, and Hand}}}
\bibcite{IwamaMorizumi2002}{{21}{2002}{{Iwama \& Morizumi}}{{Iwama and Morizumi}}}
\bibcite{janssen1997sor}{{22}{1997}{{Janssen \& Vandewalle}}{{Janssen and Vandewalle}}}
\bibcite{jukna2002triangle}{{23}{2002}{{Jukna \& Schnitger}}{{Jukna and Schnitger}}}
\bibcite{Lachish2001Explicit}{{24}{2001}{{Lachish \& Raz}}{{Lachish and Raz}}}
\bibcite{lelarasmee1982waveform}{{25}{1982}{{Lelarasmee et~al.}}{{Lelarasmee, Ruehli, and Sangiovanni-Vincentelli}}}
\bibcite{mansour2002boosting}{{26}{2002}{{Mansour \& McAllester}}{{Mansour and McAllester}}}
\bibcite{nakanishi2000ordered}{{27}{2000}{{Nakanishi et~al.}}{{Nakanishi, Hamaguchi, and Kashiwabara}}}
\bibcite{Neciporuk1966}{{28}{1966}{{Ne\v {c}iporuk}}{{}}}
\bibcite{rwlm93}{{29}{1993}{{Raghavan \& Wilkins}}{{Raghavan and Wilkins}}}
\bibcite{RoychowdhuryVatan2001quantum}{{30}{2001}{{Roychowdhury \& Vatan}}{{Roychowdhury and Vatan}}}
\bibcite{TuranVatan1997computation}{{31}{1997}{{Tur\'{a}n \& Vatan}}{{Tur\'{a}n and Vatan}}}
\bibcite{viola2009power}{{32}{2009}{{Viola}}{{}}}
\bibstyle{icml2021}
