# Supplementary material
Source: ML conference proceedings conference paper supplement (https://proceedings.mlr.press/v139/andino21a.html)
Supplement: Supplementary file 1 [file andino21a-supp.zip › learningUnitaryBPs-ICML-FinalVersion/learningBPs.bbl]

\begin{thebibliography}{32}
\providecommand{\natexlab}[1]{#1}
\providecommand{\url}[1]{\texttt{#1}}
\expandafter\ifx\csname urlstyle\endcsname\relax
  \providecommand{\doi}[1]{doi: #1}\else
  \providecommand{\doi}{doi: \begingroup \urlstyle{rm}\Url}\fi

\bibitem[Abrudan et~al.(2009)Abrudan, Eriksson, and
  Koivunen]{abrudan2009conjugate}
Abrudan, T., Eriksson, J., and Koivunen, V.
\newblock Conjugate gradient algorithm for optimization under unitary matrix
  constraint.
\newblock \emph{Signal Processing}, 89\penalty0 (9):\penalty0 1704--1714, 2009.

\bibitem[Abrudan et~al.(2008)Abrudan, Eriksson, and
  Koivunen]{abrudan2008steepest}
Abrudan, T.~E., Eriksson, J., and Koivunen, V.
\newblock Steepest descent algorithms for optimization under unitary matrix
  constraint.
\newblock \emph{IEEE Transactions on Signal Processing}, 56\penalty0
  (3):\penalty0 1134--1147, 2008.

\bibitem[Absil et~al.(2009)Absil, Mahony, and Sepulchre]{absil2009optimization}
Absil, P.-A., Mahony, R., and Sepulchre, R.
\newblock \emph{Optimization algorithms on matrix manifolds}.
\newblock Princeton University Press, 2009.

\bibitem[Adams \& Walker(1965)Adams and Walker]{adams1965complex}
Adams, J.~F. and Walker, G.
\newblock On complex stiefel manifolds.
\newblock In \emph{Mathematical Proceedings of the Cambridge Philosophical
  Society}, volume~61, pp.\  81--103. Cambridge University Press, 1965.

\bibitem[Angluin(1987)]{angluin1987learning}
Angluin, D.
\newblock Learning regular sets from queries and counterexamples.
\newblock \emph{Information and computation}, 75\penalty0 (2):\penalty0
  87--106, 1987.

\bibitem[Barrington(1989)]{barrington1989bounded}
Barrington, D.~A.
\newblock Bounded-width polynomial-size branching programs recognize exactly
  those languages in nc1.
\newblock \emph{Journal of Computer and System Sciences}, 38\penalty0
  (1):\penalty0 150--164, 1989.

\bibitem[Beame et~al.(1986)Beame, Cook, and Hoover]{beame1986log}
Beame, P.~W., Cook, S.~A., and Hoover, H.~J.
\newblock Log depth circuits for division and related problems.
\newblock \emph{SIAM Journal on Computing}, 15\penalty0 (4):\penalty0
  994--1003, 1986.

\bibitem[B{\'e}dard et~al.(1993)B{\'e}dard, Lemieux, and
  McKenzie]{bedard1993extensions}
B{\'e}dard, F., Lemieux, F., and McKenzie, P.
\newblock Extensions to barrington's m-program model.
\newblock \emph{Theoretical Computer Science}, 107\penalty0 (1):\penalty0
  31--61, 1993.

\bibitem[Bergadano et~al.(1997)Bergadano, Bshouty, Tamon, and
  Varricchio]{bergadano1997learning}
Bergadano, F., Bshouty, N.~H., Tamon, C., and Varricchio, S.
\newblock On learning branching programs and small depth circuits.
\newblock In \emph{European Conference on Computational Learning Theory}, pp.\
  150--161. Springer, 1997.

\bibitem[Boumal et~al.(2014)Boumal, Mishra, Absil, and
  Sepulchre]{boumal2014manopt}
Boumal, N., Mishra, B., Absil, P.-A., and Sepulchre, R.
\newblock Manopt, a matlab toolbox for optimization on manifolds.
\newblock \emph{The Journal of Machine Learning Research}, 15\penalty0
  (1):\penalty0 1455--1459, 2014.

\bibitem[Bshouty et~al.(1998)Bshouty, Tamon, and Wilson]{bshouty1998learning}
Bshouty, N.~H., Tamon, C., and Wilson, D.~K.
\newblock On learning width two branching programs.
\newblock \emph{Information Processing Letters}, 65\penalty0 (4):\penalty0
  217--222, 1998.

\bibitem[Caussinus(1996)]{caussinus1996note}
Caussinus, H.
\newblock A note on a theorem of barrington, straubing and th{\'e}rien.
\newblock \emph{Information Processing Letters}, 58\penalty0 (1):\penalty0
  31--33, 1996.

\bibitem[Chiu et~al.(2001)Chiu, Davida, and Litow]{chiu2001division}
Chiu, A., Davida, G., and Litow, B.
\newblock Division in logspace-uniform nc.
\newblock \emph{RAIRO-Theoretical Informatics and Applications}, 35\penalty0
  (3):\penalty0 259--275, 2001.

\bibitem[Cleve(1991)]{cleve1991towards}
Cleve, R.
\newblock Towards optimal simulations of formulas by bounded-width programs.
\newblock \emph{Computational Complexity}, 1\penalty0 (1):\penalty0 91--105,
  1991.

\bibitem[Crow \& Ilic(1990)Crow and Ilic]{crow1990waveform}
Crow, M.~L. and Ilic, M.
\newblock The waveform relaxation method for systems of differential/algebraic
  equations.
\newblock In \emph{29th IEEE Conference on Decision and Control}, pp.\
  453--458. IEEE, 1990.

\bibitem[de~Oliveira~Oliveira(2016)]{deOliveiraOliveira2016Tradeoffs}
de~Oliveira~Oliveira, M.
\newblock {Size-Treewidth Tradeoffs for Circuits Computing the Element
  Distinctness Function}.
\newblock In \emph{Proc. of the 33rd Symposium on Theoretical Aspects of
  Computer Science (STACS 2016)}, volume~47 of \emph{LIPIcs}, pp.\
  56:1--56:14, 2016.

\bibitem[Elberfeld et~al.(2012)Elberfeld, Jakoby, and
  Tantau]{elberfeld2012algorithmic}
Elberfeld, M., Jakoby, A., and Tantau, T.
\newblock Algorithmic meta theorems for circuit classes of constant and
  logarithmic depth.
\newblock In \emph{29th International Symposium on Theoretical Aspects of
  Computer Science}, pp.\ ~66, 2012.

\bibitem[Erg{\"u}n et~al.(1995)Erg{\"u}n, Kumar, and
  Rubinfeld]{ergun1995learning}
Erg{\"u}n, F., Kumar, S.~R., and Rubinfeld, R.
\newblock On learning bounded-width branching programs.
\newblock In \emph{Proceedings of the eighth annual conference on Computational
  learning theory}, pp.\  361--368, 1995.

\bibitem[Find et~al.(2015)Find, Golovnev, Hirsch, and
  Kulikov]{FindGolovnevHirschKulikov2015}
Find, M.~G., Golovnev, A., Hirsch, E.~A., and Kulikov, A.~S.
\newblock A better-than-3n lower bound for the circuit complexity of an
  explicit function.
\newblock \emph{Electronic Colloquium on Computational Complexity {(ECCC)}},
  22:\penalty0 166, 2015.

\bibitem[Huang et~al.(2018)Huang, Absil, Gallivan, and Hand]{huang2018roptlib}
Huang, W., Absil, P.-A., Gallivan, K.~A., and Hand, P.
\newblock Roptlib: an object-oriented c++ library for optimization on
  riemannian manifolds.
\newblock \emph{ACM Transactions on Mathematical Software (TOMS)}, 44\penalty0
  (4):\penalty0 1--21, 2018.

\bibitem[Iwama \& Morizumi(2002)Iwama and Morizumi]{IwamaMorizumi2002}
Iwama, K. and Morizumi, H.
\newblock An explicit lower bound of 5n- o (n) for boolean circuits.
\newblock In \emph{Mathematical foundations of computer science 2002}, pp.\
  353--364. Springer, 2002.

\bibitem[Janssen \& Vandewalle(1997)Janssen and Vandewalle]{janssen1997sor}
Janssen, J. and Vandewalle, S.
\newblock On sor waveform relaxation methods.
\newblock \emph{SIAM journal on numerical analysis}, 34\penalty0 (6):\penalty0
  2456--2481, 1997.

\bibitem[Jukna \& Schnitger(2002)Jukna and Schnitger]{jukna2002triangle}
Jukna, S. and Schnitger, G.
\newblock Triangle-freeness is hard to detect.
\newblock \emph{Combinatorics Probability and Computing}, 11\penalty0
  (6):\penalty0 549--570, 2002.

\bibitem[Lachish \& Raz(2001)Lachish and Raz]{Lachish2001Explicit}
Lachish, O. and Raz, R.
\newblock Explicit lower bound of 4.5 n-o (n) for boolena circuits.
\newblock In \emph{Proceedings of the thirty-third annual ACM symposium on
  Theory of computing}, pp.\  399--408. ACM, 2001.

\bibitem[Lelarasmee et~al.(1982)Lelarasmee, Ruehli, and
  Sangiovanni-Vincentelli]{lelarasmee1982waveform}
Lelarasmee, E., Ruehli, A.~E., and Sangiovanni-Vincentelli, A.~L.
\newblock The waveform relaxation method for time-domain analysis of large
  scale integrated circuits.
\newblock \emph{IEEE transactions on computer-aided design of integrated
  circuits and systems}, 1\penalty0 (3):\penalty0 131--145, 1982.

\bibitem[Mansour \& McAllester(2002)Mansour and
  McAllester]{mansour2002boosting}
Mansour, Y. and McAllester, D.
\newblock Boosting using branching programs.
\newblock \emph{Journal of Computer and System Sciences}, 64\penalty0
  (1):\penalty0 103--112, 2002.

\bibitem[Nakanishi et~al.(2000)Nakanishi, Hamaguchi, and
  Kashiwabara]{nakanishi2000ordered}
Nakanishi, M., Hamaguchi, K., and Kashiwabara, T.
\newblock Ordered quantum branching programs are more powerful than ordered
  probabilistic branching programs under a bounded-width restriction.
\newblock In \emph{International Computing and Combinatorics Conference}, pp.\
  467--476. Springer, 2000.

\bibitem[Ne\v{c}iporuk(1966)]{Neciporuk1966}
Ne\v{c}iporuk.
\newblock On a {B}oolean function.
\newblock \emph{Soviet Math. Dokl.}, 7\penalty0 (4):\penalty0 999--1000, 1966.

\bibitem[Raghavan \& Wilkins(1993)Raghavan and Wilkins]{rwlm93}
Raghavan, V. and Wilkins, D.
\newblock Learning $\mu$-branching programs with queries.
\newblock In \emph{Proceedings of the Sixth Annual ACM Conference on
  Computational Learning Theory}, pp.\  27--36. ACM Press, New York, NY, 1993.

\bibitem[Roychowdhury \& Vatan(2001)Roychowdhury and
  Vatan]{RoychowdhuryVatan2001quantum}
Roychowdhury, V.~P. and Vatan, F.
\newblock Quantum formulas: A lower bound and simulation.
\newblock \emph{SIAM Journal on Computing}, 31\penalty0 (2):\penalty0 460--476,
  2001.

\bibitem[Tur\'{a}n \& Vatan(1997)Tur\'{a}n and
  Vatan]{TuranVatan1997computation}
Tur\'{a}n, G. and Vatan, F.
\newblock On the computation of boolean functions by analog circuits of bounded
  fan-in.
\newblock \emph{Journal of Computer and System Sciences}, 1\penalty0
  (54):\penalty0 199--212, 1997.

\bibitem[Viola(2009)]{viola2009power}
Viola, E.
\newblock \emph{On the power of small-depth computation}.
\newblock Now Publishers Inc, 2009.

\end{thebibliography}
