# Supplementary material
Source: ML conference proceedings conference paper supplement (https://proceedings.mlr.press/v139/andino21a.html)
Supplement: Supplementary file 1 [file andino21a-supp.zip › learningUnitaryBPs-ICML-FinalVersion/learningBPs.blg]

The top-level auxiliary file: learningBPs.aux
The style file: icml2021.bst
Database file #1: learningBPs.bib
Warning--can't use both volume and number fields in adams1965complex
(There was 1 warning)
