# Supplementary material
Source: ML conference proceedings conference paper supplement (https://proceedings.mlr.press/v139/andino21a.html)
Supplement: Supplementary file 1 [file andino21a-supp.zip › learningUnitaryBPs-ICML-FinalVersion/learningBPs.log]

This is pdfTeX, Version 3.14159265-2.6-1.40.19 (MiKTeX 2.9.6630 64-bit) (preloaded format=pdflatex 2018.6.23)  12 JUN 2021 01:55
entering extended mode
**./learningBPs.tex
(learningBPs.tex
LaTeX2e <2017-04-15>
Babel <3.18> and hyphenation patterns for 75 language(s) loaded.
("C:\Program Files\MiKTeX 2.9\tex\latex\base\article.cls"
Document Class: article 2014/09/29 v1.4h Standard LaTeX document class
("C:\Program Files\MiKTeX 2.9\tex\latex\base\size10.clo"
File: size10.clo 2014/09/29 v1.4h Standard LaTeX file (size option)
)
\c@part=\count79
\c@section=\count80
\c@subsection=\count81
\c@subsubsection=\count82
\c@paragraph=\count83
\c@subparagraph=\count84
\c@figure=\count85
\c@table=\count86
\abovecaptionskip=\skip41
\belowcaptionskip=\skip42
\bibindent=\dimen102
) (C:\Users\Mateus\AppData\Roaming\MiKTeX\2.9\tex\latex\microtype\microtype.sty
Package: microtype 2018/01/14 v2.7a Micro-typographical refinements (RS)
("C:\Program Files\MiKTeX 2.9\tex\latex\graphics\keyval.sty"
Package: keyval 2014/10/28 v1.15 key=value parser (DPC)
\KV@toks@=\toks14
)
\MT@toks=\toks15
\MT@count=\count87
LaTeX Info: Redefining \textls on input line 793.
\MT@outer@kern=\dimen103
LaTeX Info: Redefining \textmicrotypecontext on input line 1339.
\MT@listname@count=\count88

(C:\Users\Mateus\AppData\Roaming\MiKTeX\2.9\tex\latex\microtype\microtype-pdfte
x.def
File: microtype-pdftex.def 2018/01/14 v2.7a Definitions specific to pdftex (RS)

LaTeX Info: Redefining \lsstyle on input line 913.
LaTeX Info: Redefining \lslig on input line 913.
\MT@outer@space=\skip43
)
Package microtype Info: Loading configuration file microtype.cfg.
(C:\Users\Mateus\AppData\Roaming\MiKTeX\2.9\tex\latex\microtype\microtype.cfg
File: microtype.cfg 2018/01/14 v2.7a microtype main configuration file (RS)
)) ("C:\Program Files\MiKTeX 2.9\tex\latex\graphics\graphicx.sty"
Package: graphicx 2017/06/01 v1.1a Enhanced LaTeX Graphics (DPC,SPQR)
("C:\Program Files\MiKTeX 2.9\tex\latex\graphics\graphics.sty"
Package: graphics 2017/06/25 v1.2c Standard LaTeX Graphics (DPC,SPQR)
("C:\Program Files\MiKTeX 2.9\tex\latex\graphics\trig.sty"
Package: trig 2016/01/03 v1.10 sin cos tan (DPC)
) ("C:\Program Files\MiKTeX 2.9\tex\latex\graphics-cfg\graphics.cfg"
File: graphics.cfg 2016/06/04 v1.11 sample graphics configuration
)
Package graphics Info: Driver file: pdftex.def on input line 99.
("C:\Program Files\MiKTeX 2.9\tex\latex\graphics-def\pdftex.def"
File: pdftex.def 2018/01/08 v1.0l Graphics/color driver for pdftex
))
\Gin@req@height=\dimen104
\Gin@req@width=\dimen105
) (C:\Users\Mateus\AppData\Roaming\MiKTeX\2.9\tex\latex\subfigure\subfigure.sty
Package: subfigure 2002/07/30 v2.1.4 subfigure package
\subfigtopskip=\skip44
\subfigcapskip=\skip45
\subfigcaptopadj=\dimen106
\subfigbottomskip=\skip46
\subfigcapmargin=\dimen107
\subfiglabelskip=\skip47
\c@subfigure=\count89
\c@lofdepth=\count90
\c@subtable=\count91
\c@lotdepth=\count92
****************************************
* Local config file subfigure.cfg used *
****************************************
(C:\Users\Mateus\AppData\Roaming\MiKTeX\2.9\tex\latex\subfigure\subfigure.cfg)
\subfig@top=\skip48
\subfig@bottom=\skip49
) (C:\Users\Mateus\AppData\Roaming\MiKTeX\2.9\tex\latex\booktabs\booktabs.sty
Package: booktabs 2005/04/14 v1.61803 publication quality tables
\heavyrulewidth=\dimen108
\lightrulewidth=\dimen109
\cmidrulewidth=\dimen110
\belowrulesep=\dimen111
\belowbottomsep=\dimen112
\aboverulesep=\dimen113
\abovetopsep=\dimen114
\cmidrulesep=\dimen115
\cmidrulekern=\dimen116
\defaultaddspace=\dimen117
\@cmidla=\count93
\@cmidlb=\count94
\@aboverulesep=\dimen118
\@belowrulesep=\dimen119
\@thisruleclass=\count95
\@lastruleclass=\count96
\@thisrulewidth=\dimen120
) (C:\Users\Mateus\AppData\Roaming\MiKTeX\2.9\tex\latex\soul\soul.sty
Package: soul 2003/11/17 v2.4 letterspacing/underlining (mf)
\SOUL@word=\toks16
\SOUL@lasttoken=\toks17
\SOUL@cmds=\toks18
\SOUL@buffer=\toks19
\SOUL@token=\toks20
\SOUL@spaceskip=\skip50
\SOUL@ttwidth=\dimen121
\SOUL@uldp=\dimen122
\SOUL@ulht=\dimen123
) (C:\Users\Mateus\AppData\Roaming\MiKTeX\2.9\tex\latex\url\url.sty
\Urlmuskip=\muskip10
Package: url 2013/09/16  ver 3.4  Verb mode for urls, etc.
) ("C:\Program Files\MiKTeX 2.9\tex\latex\hyperref\hyperref.sty"
Package: hyperref 2018/02/06 v6.86b Hypertext links for LaTeX
("C:\Program Files\MiKTeX 2.9\tex\generic\oberdiek\hobsub-hyperref.sty"
Package: hobsub-hyperref 2016/05/16 v1.14 Bundle oberdiek, subset hyperref (HO)

("C:\Program Files\MiKTeX 2.9\tex\generic\oberdiek\hobsub-generic.sty"
Package: hobsub-generic 2016/05/16 v1.14 Bundle oberdiek, subset generic (HO)
Package: hobsub 2016/05/16 v1.14 Construct package bundles (HO)
Package: infwarerr 2016/05/16 v1.4 Providing info/warning/error messages (HO)
Package: ltxcmds 2016/05/16 v1.23 LaTeX kernel commands for general use (HO)
Package: ifluatex 2016/05/16 v1.4 Provides the ifluatex switch (HO)
Package ifluatex Info: LuaTeX not detected.
Package: ifvtex 2016/05/16 v1.6 Detect VTeX and its facilities (HO)
Package ifvtex Info: VTeX not detected.
Package: intcalc 2016/05/16 v1.2 Expandable calculations with integers (HO)
Package: ifpdf 2017/03/15 v3.2 Provides the ifpdf switch
Package: etexcmds 2016/05/16 v1.6 Avoid name clashes with e-TeX commands (HO)
Package etexcmds Info: Could not find \expanded.
(etexcmds)             That can mean that you are not using pdfTeX 1.50 or
(etexcmds)             that some package has redefined \expanded.
(etexcmds)             In the latter case, load this package earlier.
Package: kvsetkeys 2016/05/16 v1.17 Key value parser (HO)
Package: kvdefinekeys 2016/05/16 v1.4 Define keys (HO)
Package: pdftexcmds 2018/01/21 v0.26 Utility functions of pdfTeX for LuaTeX (HO
)
Package pdftexcmds Info: LuaTeX not detected.
Package pdftexcmds Info: \pdf@primitive is available.
Package pdftexcmds Info: \pdf@ifprimitive is available.
Package pdftexcmds Info: \pdfdraftmode found.
Package: pdfescape 2016/05/16 v1.14 Implements pdfTeX's escape features (HO)
Package: bigintcalc 2016/05/16 v1.4 Expandable calculations on big integers (HO
)
Package: bitset 2016/05/16 v1.2 Handle bit-vector datatype (HO)
Package: uniquecounter 2016/05/16 v1.3 Provide unlimited unique counter (HO)
)
Package hobsub Info: Skipping package `hobsub' (already loaded).
Package: letltxmacro 2016/05/16 v1.5 Let assignment for LaTeX macros (HO)
Package: hopatch 2016/05/16 v1.3 Wrapper for package hooks (HO)
Package: xcolor-patch 2016/05/16 xcolor patch
Package: atveryend 2016/05/16 v1.9 Hooks at the very end of document (HO)
Package atveryend Info: \enddocument detected (standard20110627).
Package: atbegshi 2016/06/09 v1.18 At begin shipout hook (HO)
Package: refcount 2016/05/16 v3.5 Data extraction from label references (HO)
Package: hycolor 2016/05/16 v1.8 Color options for hyperref/bookmark (HO)
) ("C:\Program Files\MiKTeX 2.9\tex\generic\ifxetex\ifxetex.sty"
Package: ifxetex 2010/09/12 v0.6 Provides ifxetex conditional
) ("C:\Program Files\MiKTeX 2.9\tex\latex\oberdiek\auxhook.sty"
Package: auxhook 2016/05/16 v1.4 Hooks for auxiliary files (HO)
) ("C:\Program Files\MiKTeX 2.9\tex\latex\oberdiek\kvoptions.sty"
Package: kvoptions 2016/05/16 v3.12 Key value format for package options (HO)
)
\@linkdim=\dimen124
\Hy@linkcounter=\count97
\Hy@pagecounter=\count98
("C:\Program Files\MiKTeX 2.9\tex\latex\hyperref\pd1enc.def"
File: pd1enc.def 2018/02/06 v6.86b Hyperref: PDFDocEncoding definition (HO)
)
\Hy@SavedSpaceFactor=\count99
("C:\Program Files\MiKTeX 2.9\tex\latex\00miktex\hyperref.cfg"
File: hyperref.cfg 2002/06/06 v1.2 hyperref configuration of TeXLive
)
Package hyperref Info: Hyper figures OFF on input line 4509.
Package hyperref Info: Link nesting OFF on input line 4514.
Package hyperref Info: Hyper index ON on input line 4517.
Package hyperref Info: Plain pages OFF on input line 4524.
Package hyperref Info: Backreferencing OFF on input line 4529.
Package hyperref Info: Implicit mode ON; LaTeX internals redefined.
Package hyperref Info: Bookmarks ON on input line 4762.
\c@Hy@tempcnt=\count100
LaTeX Info: Redefining \url on input line 5115.
\XeTeXLinkMargin=\dimen125
\Fld@menulength=\count101
\Field@Width=\dimen126
\Fld@charsize=\dimen127
Package hyperref Info: Hyper figures OFF on input line 6369.
Package hyperref Info: Link nesting OFF on input line 6374.
Package hyperref Info: Hyper index ON on input line 6377.
Package hyperref Info: backreferencing OFF on input line 6384.
Package hyperref Info: Link coloring OFF on input line 6389.
Package hyperref Info: Link coloring with OCG OFF on input line 6394.
Package hyperref Info: PDF/A mode OFF on input line 6399.
LaTeX Info: Redefining \ref on input line 6439.
LaTeX Info: Redefining \pageref on input line 6443.
\Hy@abspage=\count102
\c@Item=\count103
\c@Hfootnote=\count104
)
Package hyperref Info: Driver (autodetected): hpdftex.
("C:\Program Files\MiKTeX 2.9\tex\latex\hyperref\hpdftex.def"
File: hpdftex.def 2018/02/06 v6.86b Hyperref driver for pdfTeX
\Fld@listcount=\count105
\c@bookmark@seq@number=\count106
("C:\Program Files\MiKTeX 2.9\tex\latex\oberdiek\rerunfilecheck.sty"
Package: rerunfilecheck 2016/05/16 v1.8 Rerun checks for auxiliary files (HO)
Package uniquecounter Info: New unique counter `rerunfilecheck' on input line 2
82.
)
\Hy@SectionHShift=\skip51
) ("C:\Program Files\MiKTeX 2.9\tex\latex\base\inputenc.sty"
Package: inputenc 2015/03/17 v1.2c Input encoding file
\inpenc@prehook=\toks21
\inpenc@posthook=\toks22
("C:\Program Files\MiKTeX 2.9\tex\latex\base\utf8.def"
File: utf8.def 2017/01/28 v1.1t UTF-8 support for inputenc
Now handling font encoding OML ...
... no UTF-8 mapping file for font encoding OML
Now handling font encoding T1 ...
... processing UTF-8 mapping file for font encoding T1
("C:\Program Files\MiKTeX 2.9\tex\latex\base\t1enc.dfu"
File: t1enc.dfu 2017/01/28 v1.1t UTF-8 support for inputenc
   defining Unicode char U+00A0 (decimal 160)
   defining Unicode char U+00A1 (decimal 161)
   defining Unicode char U+00A3 (decimal 163)
   defining Unicode char U+00AB (decimal 171)
   defining Unicode char U+00AD (decimal 173)
   defining Unicode char U+00BB (decimal 187)
   defining Unicode char U+00BF (decimal 191)
   defining Unicode char U+00C0 (decimal 192)
   defining Unicode char U+00C1 (decimal 193)
   defining Unicode char U+00C2 (decimal 194)
   defining Unicode char U+00C3 (decimal 195)
   defining Unicode char U+00C4 (decimal 196)
   defining Unicode char U+00C5 (decimal 197)
   defining Unicode char U+00C6 (decimal 198)
   defining Unicode char U+00C7 (decimal 199)
   defining Unicode char U+00C8 (decimal 200)
   defining Unicode char U+00C9 (decimal 201)
   defining Unicode char U+00CA (decimal 202)
   defining Unicode char U+00CB (decimal 203)
   defining Unicode char U+00CC (decimal 204)
   defining Unicode char U+00CD (decimal 205)
   defining Unicode char U+00CE (decimal 206)
   defining Unicode char U+00CF (decimal 207)
   defining Unicode char U+00D0 (decimal 208)
   defining Unicode char U+00D1 (decimal 209)
   defining Unicode char U+00D2 (decimal 210)
   defining Unicode char U+00D3 (decimal 211)
   defining Unicode char U+00D4 (decimal 212)
   defining Unicode char U+00D5 (decimal 213)
   defining Unicode char U+00D6 (decimal 214)
   defining Unicode char U+00D8 (decimal 216)
   defining Unicode char U+00D9 (decimal 217)
   defining Unicode char U+00DA (decimal 218)
   defining Unicode char U+00DB (decimal 219)
   defining Unicode char U+00DC (decimal 220)
   defining Unicode char U+00DD (decimal 221)
   defining Unicode char U+00DE (decimal 222)
   defining Unicode char U+00DF (decimal 223)
   defining Unicode char U+00E0 (decimal 224)
   defining Unicode char U+00E1 (decimal 225)
   defining Unicode char U+00E2 (decimal 226)
   defining Unicode char U+00E3 (decimal 227)
   defining Unicode char U+00E4 (decimal 228)
   defining Unicode char U+00E5 (decimal 229)
   defining Unicode char U+00E6 (decimal 230)
   defining Unicode char U+00E7 (decimal 231)
   defining Unicode char U+00E8 (decimal 232)
   defining Unicode char U+00E9 (decimal 233)
   defining Unicode char U+00EA (decimal 234)
   defining Unicode char U+00EB (decimal 235)
   defining Unicode char U+00EC (decimal 236)
   defining Unicode char U+00ED (decimal 237)
   defining Unicode char U+00EE (decimal 238)
   defining Unicode char U+00EF (decimal 239)
   defining Unicode char U+00F0 (decimal 240)
   defining Unicode char U+00F1 (decimal 241)
   defining Unicode char U+00F2 (decimal 242)
   defining Unicode char U+00F3 (decimal 243)
   defining Unicode char U+00F4 (decimal 244)
   defining Unicode char U+00F5 (decimal 245)
   defining Unicode char U+00F6 (decimal 246)
   defining Unicode char U+00F8 (decimal 248)
   defining Unicode char U+00F9 (decimal 249)
   defining Unicode char U+00FA (decimal 250)
   defining Unicode char U+00FB (decimal 251)
   defining Unicode char U+00FC (decimal 252)
   defining Unicode char U+00FD (decimal 253)
   defining Unicode char U+00FE (decimal 254)
   defining Unicode char U+00FF (decimal 255)
   defining Unicode char U+0100 (decimal 256)
   defining Unicode char U+0101 (decimal 257)
   defining Unicode char U+0102 (decimal 258)
   defining Unicode char U+0103 (decimal 259)
   defining Unicode char U+0104 (decimal 260)
   defining Unicode char U+0105 (decimal 261)
   defining Unicode char U+0106 (decimal 262)
   defining Unicode char U+0107 (decimal 263)
   defining Unicode char U+0108 (decimal 264)
   defining Unicode char U+0109 (decimal 265)
   defining Unicode char U+010A (decimal 266)
   defining Unicode char U+010B (decimal 267)
   defining Unicode char U+010C (decimal 268)
   defining Unicode char U+010D (decimal 269)
   defining Unicode char U+010E (decimal 270)
   defining Unicode char U+010F (decimal 271)
   defining Unicode char U+0110 (decimal 272)
   defining Unicode char U+0111 (decimal 273)
   defining Unicode char U+0112 (decimal 274)
   defining Unicode char U+0113 (decimal 275)
   defining Unicode char U+0114 (decimal 276)
   defining Unicode char U+0115 (decimal 277)
   defining Unicode char U+0116 (decimal 278)
   defining Unicode char U+0117 (decimal 279)
   defining Unicode char U+0118 (decimal 280)
   defining Unicode char U+0119 (decimal 281)
   defining Unicode char U+011A (decimal 282)
   defining Unicode char U+011B (decimal 283)
   defining Unicode char U+011C (decimal 284)
   defining Unicode char U+011D (decimal 285)
   defining Unicode char U+011E (decimal 286)
   defining Unicode char U+011F (decimal 287)
   defining Unicode char U+0120 (decimal 288)
   defining Unicode char U+0121 (decimal 289)
   defining Unicode char U+0122 (decimal 290)
   defining Unicode char U+0123 (decimal 291)
   defining Unicode char U+0124 (decimal 292)
   defining Unicode char U+0125 (decimal 293)
   defining Unicode char U+0128 (decimal 296)
   defining Unicode char U+0129 (decimal 297)
   defining Unicode char U+012A (decimal 298)
   defining Unicode char U+012B (decimal 299)
   defining Unicode char U+012C (decimal 300)
   defining Unicode char U+012D (decimal 301)
   defining Unicode char U+012E (decimal 302)
   defining Unicode char U+012F (decimal 303)
   defining Unicode char U+0130 (decimal 304)
   defining Unicode char U+0131 (decimal 305)
   defining Unicode char U+0132 (decimal 306)
   defining Unicode char U+0133 (decimal 307)
   defining Unicode char U+0134 (decimal 308)
   defining Unicode char U+0135 (decimal 309)
   defining Unicode char U+0136 (decimal 310)
   defining Unicode char U+0137 (decimal 311)
   defining Unicode char U+0139 (decimal 313)
   defining Unicode char U+013A (decimal 314)
   defining Unicode char U+013B (decimal 315)
   defining Unicode char U+013C (decimal 316)
   defining Unicode char U+013D (decimal 317)
   defining Unicode char U+013E (decimal 318)
   defining Unicode char U+0141 (decimal 321)
   defining Unicode char U+0142 (decimal 322)
   defining Unicode char U+0143 (decimal 323)
   defining Unicode char U+0144 (decimal 324)
   defining Unicode char U+0145 (decimal 325)
   defining Unicode char U+0146 (decimal 326)
   defining Unicode char U+0147 (decimal 327)
   defining Unicode char U+0148 (decimal 328)
   defining Unicode char U+014A (decimal 330)
   defining Unicode char U+014B (decimal 331)
   defining Unicode char U+014C (decimal 332)
   defining Unicode char U+014D (decimal 333)
   defining Unicode char U+014E (decimal 334)
   defining Unicode char U+014F (decimal 335)
   defining Unicode char U+0150 (decimal 336)
   defining Unicode char U+0151 (decimal 337)
   defining Unicode char U+0152 (decimal 338)
   defining Unicode char U+0153 (decimal 339)
   defining Unicode char U+0154 (decimal 340)
   defining Unicode char U+0155 (decimal 341)
   defining Unicode char U+0156 (decimal 342)
   defining Unicode char U+0157 (decimal 343)
   defining Unicode char U+0158 (decimal 344)
   defining Unicode char U+0159 (decimal 345)
   defining Unicode char U+015A (decimal 346)
   defining Unicode char U+015B (decimal 347)
   defining Unicode char U+015C (decimal 348)
   defining Unicode char U+015D (decimal 349)
   defining Unicode char U+015E (decimal 350)
   defining Unicode char U+015F (decimal 351)
   defining Unicode char U+0160 (decimal 352)
   defining Unicode char U+0161 (decimal 353)
   defining Unicode char U+0162 (decimal 354)
   defining Unicode char U+0163 (decimal 355)
   defining Unicode char U+0164 (decimal 356)
   defining Unicode char U+0165 (decimal 357)
   defining Unicode char U+0168 (decimal 360)
   defining Unicode char U+0169 (decimal 361)
   defining Unicode char U+016A (decimal 362)
   defining Unicode char U+016B (decimal 363)
   defining Unicode char U+016C (decimal 364)
   defining Unicode char U+016D (decimal 365)
   defining Unicode char U+016E (decimal 366)
   defining Unicode char U+016F (decimal 367)
   defining Unicode char U+0170 (decimal 368)
   defining Unicode char U+0171 (decimal 369)
   defining Unicode char U+0172 (decimal 370)
   defining Unicode char U+0173 (decimal 371)
   defining Unicode char U+0174 (decimal 372)
   defining Unicode char U+0175 (decimal 373)
   defining Unicode char U+0176 (decimal 374)
   defining Unicode char U+0177 (decimal 375)
   defining Unicode char U+0178 (decimal 376)
   defining Unicode char U+0179 (decimal 377)
   defining Unicode char U+017A (decimal 378)
   defining Unicode char U+017B (decimal 379)
   defining Unicode char U+017C (decimal 380)
   defining Unicode char U+017D (decimal 381)
   defining Unicode char U+017E (decimal 382)
   defining Unicode char U+01CD (decimal 461)
   defining Unicode char U+01CE (decimal 462)
   defining Unicode char U+01CF (decimal 463)
   defining Unicode char U+01D0 (decimal 464)
   defining Unicode char U+01D1 (decimal 465)
   defining Unicode char U+01D2 (decimal 466)
   defining Unicode char U+01D3 (decimal 467)
   defining Unicode char U+01D4 (decimal 468)
   defining Unicode char U+01E2 (decimal 482)
   defining Unicode char U+01E3 (decimal 483)
   defining Unicode char U+01E6 (decimal 486)
   defining Unicode char U+01E7 (decimal 487)
   defining Unicode char U+01E8 (decimal 488)
   defining Unicode char U+01E9 (decimal 489)
   defining Unicode char U+01EA (decimal 490)
   defining Unicode char U+01EB (decimal 491)
   defining Unicode char U+01F0 (decimal 496)
   defining Unicode char U+01F4 (decimal 500)
   defining Unicode char U+01F5 (decimal 501)
   defining Unicode char U+0218 (decimal 536)
   defining Unicode char U+0219 (decimal 537)
   defining Unicode char U+021A (decimal 538)
   defining Unicode char U+021B (decimal 539)
   defining Unicode char U+0232 (decimal 562)
   defining Unicode char U+0233 (decimal 563)
   defining Unicode char U+1E02 (decimal 7682)
   defining Unicode char U+1E03 (decimal 7683)
   defining Unicode char U+200C (decimal 8204)
   defining Unicode char U+2010 (decimal 8208)
   defining Unicode char U+2011 (decimal 8209)
   defining Unicode char U+2012 (decimal 8210)
   defining Unicode char U+2013 (decimal 8211)
   defining Unicode char U+2014 (decimal 8212)
   defining Unicode char U+2015 (decimal 8213)
   defining Unicode char U+2018 (decimal 8216)
   defining Unicode char U+2019 (decimal 8217)
   defining Unicode char U+201A (decimal 8218)
   defining Unicode char U+201C (decimal 8220)
   defining Unicode char U+201D (decimal 8221)
   defining Unicode char U+201E (decimal 8222)
   defining Unicode char U+2030 (decimal 8240)
   defining Unicode char U+2031 (decimal 8241)
   defining Unicode char U+2039 (decimal 8249)
   defining Unicode char U+203A (decimal 8250)
   defining Unicode char U+2423 (decimal 9251)
   defining Unicode char U+1E20 (decimal 7712)
   defining Unicode char U+1E21 (decimal 7713)
)
Now handling font encoding OT1 ...
... processing UTF-8 mapping file for font encoding OT1
("C:\Program Files\MiKTeX 2.9\tex\latex\base\ot1enc.dfu"
File: ot1enc.dfu 2017/01/28 v1.1t UTF-8 support for inputenc
   defining Unicode char U+00A0 (decimal 160)
   defining Unicode char U+00A1 (decimal 161)
   defining Unicode char U+00A3 (decimal 163)
   defining Unicode char U+00AD (decimal 173)
   defining Unicode char U+00B8 (decimal 184)
   defining Unicode char U+00BF (decimal 191)
   defining Unicode char U+00C5 (decimal 197)
   defining Unicode char U+00C6 (decimal 198)
   defining Unicode char U+00D8 (decimal 216)
   defining Unicode char U+00DF (decimal 223)
   defining Unicode char U+00E6 (decimal 230)
   defining Unicode char U+00EC (decimal 236)
   defining Unicode char U+00ED (decimal 237)
   defining Unicode char U+00EE (decimal 238)
   defining Unicode char U+00EF (decimal 239)
   defining Unicode char U+00F8 (decimal 248)
   defining Unicode char U+0131 (decimal 305)
   defining Unicode char U+0141 (decimal 321)
   defining Unicode char U+0142 (decimal 322)
   defining Unicode char U+0152 (decimal 338)
   defining Unicode char U+0153 (decimal 339)
   defining Unicode char U+0174 (decimal 372)
   defining Unicode char U+0175 (decimal 373)
   defining Unicode char U+0176 (decimal 374)
   defining Unicode char U+0177 (decimal 375)
   defining Unicode char U+0218 (decimal 536)
   defining Unicode char U+0219 (decimal 537)
   defining Unicode char U+021A (decimal 538)
   defining Unicode char U+021B (decimal 539)
   defining Unicode char U+2013 (decimal 8211)
   defining Unicode char U+2014 (decimal 8212)
   defining Unicode char U+2018 (decimal 8216)
   defining Unicode char U+2019 (decimal 8217)
   defining Unicode char U+201C (decimal 8220)
   defining Unicode char U+201D (decimal 8221)
)
Now handling font encoding OMS ...
... processing UTF-8 mapping file for font encoding OMS
("C:\Program Files\MiKTeX 2.9\tex\latex\base\omsenc.dfu"
File: omsenc.dfu 2017/01/28 v1.1t UTF-8 support for inputenc
   defining Unicode char U+00A7 (decimal 167)
   defining Unicode char U+00B6 (decimal 182)
   defining Unicode char U+00B7 (decimal 183)
   defining Unicode char U+2020 (decimal 8224)
   defining Unicode char U+2021 (decimal 8225)
   defining Unicode char U+2022 (decimal 8226)
)
Now handling font encoding OMX ...
... no UTF-8 mapping file for font encoding OMX
Now handling font encoding U ...
... no UTF-8 mapping file for font encoding U
Now handling font encoding PD1 ...
... no UTF-8 mapping file for font encoding PD1
   defining Unicode char U+00A9 (decimal 169)
   defining Unicode char U+00AA (decimal 170)
   defining Unicode char U+00AE (decimal 174)
   defining Unicode char U+00BA (decimal 186)
   defining Unicode char U+02C6 (decimal 710)
   defining Unicode char U+02DC (decimal 732)
   defining Unicode char U+200C (decimal 8204)
   defining Unicode char U+2026 (decimal 8230)
   defining Unicode char U+2122 (decimal 8482)
   defining Unicode char U+2423 (decimal 9251)
)) (C:\Users\Mateus\AppData\Roaming\MiKTeX\2.9\tex\latex\caption\caption.sty
Package: caption 2018/05/01 v3.3-147 Customizing captions (AR)
(C:\Users\Mateus\AppData\Roaming\MiKTeX\2.9\tex\latex\caption\caption3.sty
Package: caption3 2018/05/27 v1.8a caption3 kernel (AR)
Package caption3 Info: TeX engine: e-TeX on input line 64.
\captionmargin=\dimen128
\captionmargin@=\dimen129
\captionwidth=\dimen130
\caption@tempdima=\dimen131
\caption@indent=\dimen132
\caption@parindent=\dimen133
\caption@hangindent=\dimen134
)
\c@ContinuedFloat=\count107
Package caption Info: hyperref package is loaded.
Package caption Info: subfigure package is loaded.
) ("C:\Program Files\MiKTeX 2.9\tex\latex\amsmath\amsmath.sty"
Package: amsmath 2017/09/02 v2.17a AMS math features
\@mathmargin=\skip52
For additional information on amsmath, use the `?' option.
("C:\Program Files\MiKTeX 2.9\tex\latex\amsmath\amstext.sty"
Package: amstext 2000/06/29 v2.01 AMS text
("C:\Program Files\MiKTeX 2.9\tex\latex\amsmath\amsgen.sty"
File: amsgen.sty 1999/11/30 v2.0 generic functions
\@emptytoks=\toks23
\ex@=\dimen135
)) ("C:\Program Files\MiKTeX 2.9\tex\latex\amsmath\amsbsy.sty"
Package: amsbsy 1999/11/29 v1.2d Bold Symbols
\pmbraise@=\dimen136
) ("C:\Program Files\MiKTeX 2.9\tex\latex\amsmath\amsopn.sty"
Package: amsopn 2016/03/08 v2.02 operator names
)
\inf@bad=\count108
LaTeX Info: Redefining \frac on input line 213.
\uproot@=\count109
\leftroot@=\count110
LaTeX Info: Redefining \overline on input line 375.
\classnum@=\count111
\DOTSCASE@=\count112
LaTeX Info: Redefining \ldots on input line 472.
LaTeX Info: Redefining \dots on input line 475.
LaTeX Info: Redefining \cdots on input line 596.
\Mathstrutbox@=\box26
\strutbox@=\box27
\big@size=\dimen137
LaTeX Font Info:    Redeclaring font encoding OML on input line 712.
LaTeX Font Info:    Redeclaring font encoding OMS on input line 713.
\macc@depth=\count113
\c@MaxMatrixCols=\count114
\dotsspace@=\muskip11
\c@parentequation=\count115
\dspbrk@lvl=\count116
\tag@help=\toks24
\row@=\count117
\column@=\count118
\maxfields@=\count119
\andhelp@=\toks25
\eqnshift@=\dimen138
\alignsep@=\dimen139
\tagshift@=\dimen140
\tagwidth@=\dimen141
\totwidth@=\dimen142
\lineht@=\dimen143
\@envbody=\toks26
\multlinegap=\skip53
\multlinetaggap=\skip54
\mathdisplay@stack=\toks27
LaTeX Info: Redefining \[ on input line 2817.
LaTeX Info: Redefining \] on input line 2818.
) ("C:\Program Files\MiKTeX 2.9\tex\latex\amscls\amsthm.sty"
Package: amsthm 2017/10/31 v2.20.4
\thm@style=\toks28
\thm@bodyfont=\toks29
\thm@headfont=\toks30
\thm@notefont=\toks31
\thm@headpunct=\toks32
\thm@preskip=\skip55
\thm@postskip=\skip56
\thm@headsep=\skip57
\dth@everypar=\toks33
) (C:\Users\Mateus\AppData\Roaming\MiKTeX\2.9\tex\latex\savesym\savesym.sty
Package: savesym 2013/09/02 v1.2 Saves and restores symbols (JG)
)
(C:\Users\Mateus\AppData\Roaming\MiKTeX\2.9\tex\latex\algorithm2e\algorithm2e.s
ty
Package: algorithm2e 2017/07/18 v5.2 algorithms environments
\c@AlgoLine=\count120
("C:\Program Files\MiKTeX 2.9\tex\latex\base\ifthen.sty"
Package: ifthen 2014/09/29 v1.1c Standard LaTeX ifthen package (DPC)
)
\algocf@hangindent=\skip58
(C:\Users\Mateus\AppData\Roaming\MiKTeX\2.9\tex\latex\ifoddpage\ifoddpage.sty
Package: ifoddpage 2016/04/23 v1.1 Conditionals for odd/even page detection
\c@checkoddpage=\count121
) ("C:\Program Files\MiKTeX 2.9\tex\latex\tools\xspace.sty"
Package: xspace 2014/10/28 v1.13 Space after command names (DPC,MH)
) ("C:\Program Files\MiKTeX 2.9\tex\latex\ltxmisc\relsize.sty"
Package: relsize 2003/07/04 ver 3.1
)
\skiptotal=\skip59
\skiplinenumber=\skip60
\skiprule=\skip61
\skiphlne=\skip62
\skiptext=\skip63
\skiplength=\skip64
\algomargin=\skip65
\skipalgocfslide=\skip66
\algowidth=\dimen144
\inoutsize=\dimen145
\inoutindent=\dimen146
\interspacetitleruled=\dimen147
\interspacealgoruled=\dimen148
\interspacetitleboxruled=\dimen149
\algocf@ruledwidth=\skip67
\algocf@inoutbox=\box28
\algocf@inputbox=\box29
\AlCapSkip=\skip68
\AlCapHSkip=\skip69
\algoskipindent=\skip70
\algocf@nlbox=\box30
\algocf@hangingbox=\box31
\algocf@untilbox=\box32
\algocf@skipuntil=\skip71
\algocf@capbox=\box33
\algocf@lcaptionbox=\skip72
\algoheightruledefault=\skip73
\algoheightrule=\skip74
\algotitleheightruledefault=\skip75
\algotitleheightrule=\skip76
\c@algocfline=\count122
\c@algocfproc=\count123
\c@algocf=\count124
\algocf@algoframe=\box34
\algocf@algobox=\box35
) (preamble.tex ("C:\Program Files\MiKTeX 2.9\tex\latex\amsfonts\amssymb.sty"
Package: amssymb 2013/01/14 v3.01 AMS font symbols
("C:\Program Files\MiKTeX 2.9\tex\latex\amsfonts\amsfonts.sty"
Package: amsfonts 2013/01/14 v3.01 Basic AMSFonts support
\symAMSa=\mathgroup4
\symAMSb=\mathgroup5
LaTeX Font Info:    Overwriting math alphabet `\mathfrak' in version `bold'
(Font)                  U/euf/m/n --> U/euf/b/n on input line 106.
)) ("C:\Program Files\MiKTeX 2.9\tex\latex\tools\enumerate.sty"
Package: enumerate 2015/07/23 v3.00 enumerate extensions (DPC)
\@enLab=\toks34
) (C:\Users\Mateus\AppData\Roaming\MiKTeX\2.9\tex\latex\stmaryrd\stmaryrd.sty
Package: stmaryrd 1994/03/03 St Mary's Road symbol package
\symstmry=\mathgroup6
LaTeX Font Info:    Overwriting symbol font `stmry' in version `bold'
(Font)                  U/stmry/m/n --> U/stmry/b/n on input line 89.
) (C:\Users\Mateus\AppData\Roaming\MiKTeX\2.9\tex\latex\todonotes\todonotes.sty
Package: todonotes 2015/07/09 .dtx Todonotes source and documentation.
Package: todonotes 2012/07/25
("C:\Program Files\MiKTeX 2.9\tex\latex\xkeyval\xkeyval.sty"
Package: xkeyval 2014/12/03 v2.7a package option processing (HA)
("C:\Program Files\MiKTeX 2.9\tex\generic\xkeyval\xkeyval.tex" ("C:\Program Fil
es\MiKTeX 2.9\tex\generic\xkeyval\xkvutils.tex"
\XKV@toks=\toks35
\XKV@tempa@toks=\toks36
)
\XKV@depth=\count125
File: xkeyval.tex 2014/12/03 v2.7a key=value parser (HA)
)) (C:\Users\Mateus\AppData\Roaming\MiKTeX\2.9\tex\latex\xcolor\xcolor.sty
Package: xcolor 2016/05/11 v2.12 LaTeX color extensions (UK)
("C:\Program Files\MiKTeX 2.9\tex\latex\graphics-cfg\color.cfg"
File: color.cfg 2016/01/02 v1.6 sample color configuration
)
Package xcolor Info: Driver file: pdftex.def on input line 225.
Package xcolor Info: Model `cmy' substituted by `cmy0' on input line 1348.
Package xcolor Info: Model `hsb' substituted by `rgb' on input line 1352.
Package xcolor Info: Model `RGB' extended on input line 1364.
Package xcolor Info: Model `HTML' substituted by `rgb' on input line 1366.
Package xcolor Info: Model `Hsb' substituted by `hsb' on input line 1367.
Package xcolor Info: Model `tHsb' substituted by `hsb' on input line 1368.
Package xcolor Info: Model `HSB' substituted by `hsb' on input line 1369.
Package xcolor Info: Model `Gray' substituted by `gray' on input line 1370.
Package xcolor Info: Model `wave' substituted by `hsb' on input line 1371.
)
(C:\Users\Mateus\AppData\Roaming\MiKTeX\2.9\tex\latex\pgf\frontendlayer\tikz.st
y (C:\Users\Mateus\AppData\Roaming\MiKTeX\2.9\tex\latex\pgf\basiclayer\pgf.sty 
(C:\Users\Mateus\AppData\Roaming\MiKTeX\2.9\tex\latex\pgf\utilities\pgfrcs.sty
(C:\Users\Mateus\AppData\Roaming\MiKTeX\2.9\tex\generic\pgf\utilities\pgfutil-c
ommon.tex
\pgfutil@everybye=\toks37
\pgfutil@tempdima=\dimen150
\pgfutil@tempdimb=\dimen151

(C:\Users\Mateus\AppData\Roaming\MiKTeX\2.9\tex\generic\pgf\utilities\pgfutil-c
ommon-lists.tex))
(C:\Users\Mateus\AppData\Roaming\MiKTeX\2.9\tex\generic\pgf\utilities\pgfutil-l
atex.def
\pgfutil@abb=\box36
(C:\Users\Mateus\AppData\Roaming\MiKTeX\2.9\tex\latex\ms\everyshi.sty
Package: everyshi 2001/05/15 v3.00 EveryShipout Package (MS)
))
(C:\Users\Mateus\AppData\Roaming\MiKTeX\2.9\tex\generic\pgf\utilities\pgfrcs.co
de.tex
Package: pgfrcs 2015/08/07 v3.0.1a (rcs-revision 1.31)
))
Package: pgf 2015/08/07 v3.0.1a (rcs-revision 1.15)

(C:\Users\Mateus\AppData\Roaming\MiKTeX\2.9\tex\latex\pgf\basiclayer\pgfcore.st
y
(C:\Users\Mateus\AppData\Roaming\MiKTeX\2.9\tex\latex\pgf\systemlayer\pgfsys.st
y
(C:\Users\Mateus\AppData\Roaming\MiKTeX\2.9\tex\generic\pgf\systemlayer\pgfsys.
code.tex
Package: pgfsys 2014/07/09 v3.0.1a (rcs-revision 1.48)

(C:\Users\Mateus\AppData\Roaming\MiKTeX\2.9\tex\generic\pgf\utilities\pgfkeys.c
ode.tex
\pgfkeys@pathtoks=\toks38
\pgfkeys@temptoks=\toks39

(C:\Users\Mateus\AppData\Roaming\MiKTeX\2.9\tex\generic\pgf\utilities\pgfkeysfi
ltered.code.tex
\pgfkeys@tmptoks=\toks40
))
\pgf@x=\dimen152
\pgf@y=\dimen153
\pgf@xa=\dimen154
\pgf@ya=\dimen155
\pgf@xb=\dimen156
\pgf@yb=\dimen157
\pgf@xc=\dimen158
\pgf@yc=\dimen159
\w@pgf@writea=\write3
\r@pgf@reada=\read1
\c@pgf@counta=\count126
\c@pgf@countb=\count127
\c@pgf@countc=\count128
\c@pgf@countd=\count129
\t@pgf@toka=\toks41
\t@pgf@tokb=\toks42
\t@pgf@tokc=\toks43

(C:\Users\Mateus\AppData\Roaming\MiKTeX\2.9\tex\generic\pgf\systemlayer\pgf.cfg
File: pgf.cfg 2008/05/14  (rcs-revision 1.7)
)
Driver file for pgf: pgfsys-pdftex.def

(C:\Users\Mateus\AppData\Roaming\MiKTeX\2.9\tex\generic\pgf\systemlayer\pgfsys-
pdftex.def
File: pgfsys-pdftex.def 2014/10/11  (rcs-revision 1.35)

(C:\Users\Mateus\AppData\Roaming\MiKTeX\2.9\tex\generic\pgf\systemlayer\pgfsys-
common-pdf.def
File: pgfsys-common-pdf.def 2013/10/10  (rcs-revision 1.13)
)))
(C:\Users\Mateus\AppData\Roaming\MiKTeX\2.9\tex\generic\pgf\systemlayer\pgfsyss
oftpath.code.tex
File: pgfsyssoftpath.code.tex 2013/09/09  (rcs-revision 1.9)
\pgfsyssoftpath@smallbuffer@items=\count130
\pgfsyssoftpath@bigbuffer@items=\count131
)
(C:\Users\Mateus\AppData\Roaming\MiKTeX\2.9\tex\generic\pgf\systemlayer\pgfsysp
rotocol.code.tex
File: pgfsysprotocol.code.tex 2006/10/16  (rcs-revision 1.4)
))
(C:\Users\Mateus\AppData\Roaming\MiKTeX\2.9\tex\generic\pgf\basiclayer\pgfcore.
code.tex
Package: pgfcore 2010/04/11 v3.0.1a (rcs-revision 1.7)

(C:\Users\Mateus\AppData\Roaming\MiKTeX\2.9\tex\generic\pgf\math\pgfmath.code.t
ex
(C:\Users\Mateus\AppData\Roaming\MiKTeX\2.9\tex\generic\pgf\math\pgfmathcalc.co
de.tex
(C:\Users\Mateus\AppData\Roaming\MiKTeX\2.9\tex\generic\pgf\math\pgfmathutil.co
de.tex)
(C:\Users\Mateus\AppData\Roaming\MiKTeX\2.9\tex\generic\pgf\math\pgfmathparser.
code.tex
\pgfmath@dimen=\dimen160
\pgfmath@count=\count132
\pgfmath@box=\box37
\pgfmath@toks=\toks44
\pgfmath@stack@operand=\toks45
\pgfmath@stack@operation=\toks46
)
(C:\Users\Mateus\AppData\Roaming\MiKTeX\2.9\tex\generic\pgf\math\pgfmathfunctio
ns.code.tex
(C:\Users\Mateus\AppData\Roaming\MiKTeX\2.9\tex\generic\pgf\math\pgfmathfunctio
ns.basic.code.tex)
(C:\Users\Mateus\AppData\Roaming\MiKTeX\2.9\tex\generic\pgf\math\pgfmathfunctio
ns.trigonometric.code.tex)
(C:\Users\Mateus\AppData\Roaming\MiKTeX\2.9\tex\generic\pgf\math\pgfmathfunctio
ns.random.code.tex)
(C:\Users\Mateus\AppData\Roaming\MiKTeX\2.9\tex\generic\pgf\math\pgfmathfunctio
ns.comparison.code.tex)
(C:\Users\Mateus\AppData\Roaming\MiKTeX\2.9\tex\generic\pgf\math\pgfmathfunctio
ns.base.code.tex)
(C:\Users\Mateus\AppData\Roaming\MiKTeX\2.9\tex\generic\pgf\math\pgfmathfunctio
ns.round.code.tex)
(C:\Users\Mateus\AppData\Roaming\MiKTeX\2.9\tex\generic\pgf\math\pgfmathfunctio
ns.misc.code.tex)
(C:\Users\Mateus\AppData\Roaming\MiKTeX\2.9\tex\generic\pgf\math\pgfmathfunctio
ns.integerarithmetics.code.tex)))
(C:\Users\Mateus\AppData\Roaming\MiKTeX\2.9\tex\generic\pgf\math\pgfmathfloat.c
ode.tex
\c@pgfmathroundto@lastzeros=\count133
))
(C:\Users\Mateus\AppData\Roaming\MiKTeX\2.9\tex\generic\pgf\basiclayer\pgfcorep
oints.code.tex
File: pgfcorepoints.code.tex 2013/10/07  (rcs-revision 1.27)
\pgf@picminx=\dimen161
\pgf@picmaxx=\dimen162
\pgf@picminy=\dimen163
\pgf@picmaxy=\dimen164
\pgf@pathminx=\dimen165
\pgf@pathmaxx=\dimen166
\pgf@pathminy=\dimen167
\pgf@pathmaxy=\dimen168
\pgf@xx=\dimen169
\pgf@xy=\dimen170
\pgf@yx=\dimen171
\pgf@yy=\dimen172
\pgf@zx=\dimen173
\pgf@zy=\dimen174
)
(C:\Users\Mateus\AppData\Roaming\MiKTeX\2.9\tex\generic\pgf\basiclayer\pgfcorep
athconstruct.code.tex
File: pgfcorepathconstruct.code.tex 2013/10/07  (rcs-revision 1.29)
\pgf@path@lastx=\dimen175
\pgf@path@lasty=\dimen176
)
(C:\Users\Mateus\AppData\Roaming\MiKTeX\2.9\tex\generic\pgf\basiclayer\pgfcorep
athusage.code.tex
File: pgfcorepathusage.code.tex 2014/11/02  (rcs-revision 1.24)
\pgf@shorten@end@additional=\dimen177
\pgf@shorten@start@additional=\dimen178
)
(C:\Users\Mateus\AppData\Roaming\MiKTeX\2.9\tex\generic\pgf\basiclayer\pgfcores
copes.code.tex
File: pgfcorescopes.code.tex 2015/05/08  (rcs-revision 1.46)
\pgfpic=\box38
\pgf@hbox=\box39
\pgf@layerbox@main=\box40
\pgf@picture@serial@count=\count134
)
(C:\Users\Mateus\AppData\Roaming\MiKTeX\2.9\tex\generic\pgf\basiclayer\pgfcoreg
raphicstate.code.tex
File: pgfcoregraphicstate.code.tex 2014/11/02  (rcs-revision 1.12)
\pgflinewidth=\dimen179
)
(C:\Users\Mateus\AppData\Roaming\MiKTeX\2.9\tex\generic\pgf\basiclayer\pgfcoret
ransformations.code.tex
File: pgfcoretransformations.code.tex 2015/08/07  (rcs-revision 1.20)
\pgf@pt@x=\dimen180
\pgf@pt@y=\dimen181
\pgf@pt@temp=\dimen182
)
(C:\Users\Mateus\AppData\Roaming\MiKTeX\2.9\tex\generic\pgf\basiclayer\pgfcoreq
uick.code.tex
File: pgfcorequick.code.tex 2008/10/09  (rcs-revision 1.3)
)
(C:\Users\Mateus\AppData\Roaming\MiKTeX\2.9\tex\generic\pgf\basiclayer\pgfcoreo
bjects.code.tex
File: pgfcoreobjects.code.tex 2006/10/11  (rcs-revision 1.2)
)
(C:\Users\Mateus\AppData\Roaming\MiKTeX\2.9\tex\generic\pgf\basiclayer\pgfcorep
athprocessing.code.tex
File: pgfcorepathprocessing.code.tex 2013/09/09  (rcs-revision 1.9)
)
(C:\Users\Mateus\AppData\Roaming\MiKTeX\2.9\tex\generic\pgf\basiclayer\pgfcorea
rrows.code.tex
File: pgfcorearrows.code.tex 2015/05/14  (rcs-revision 1.43)
\pgfarrowsep=\dimen183
)
(C:\Users\Mateus\AppData\Roaming\MiKTeX\2.9\tex\generic\pgf\basiclayer\pgfcores
hade.code.tex
File: pgfcoreshade.code.tex 2013/07/15  (rcs-revision 1.15)
\pgf@max=\dimen184
\pgf@sys@shading@range@num=\count135
)
(C:\Users\Mateus\AppData\Roaming\MiKTeX\2.9\tex\generic\pgf\basiclayer\pgfcorei
mage.code.tex
File: pgfcoreimage.code.tex 2013/07/15  (rcs-revision 1.18)

(C:\Users\Mateus\AppData\Roaming\MiKTeX\2.9\tex\generic\pgf\basiclayer\pgfcoree
xternal.code.tex
File: pgfcoreexternal.code.tex 2014/07/09  (rcs-revision 1.21)
\pgfexternal@startupbox=\box41
))
(C:\Users\Mateus\AppData\Roaming\MiKTeX\2.9\tex\generic\pgf\basiclayer\pgfcorel
ayers.code.tex
File: pgfcorelayers.code.tex 2013/07/18  (rcs-revision 1.7)
)
(C:\Users\Mateus\AppData\Roaming\MiKTeX\2.9\tex\generic\pgf\basiclayer\pgfcoret
ransparency.code.tex
File: pgfcoretransparency.code.tex 2013/09/30  (rcs-revision 1.5)
)
(C:\Users\Mateus\AppData\Roaming\MiKTeX\2.9\tex\generic\pgf\basiclayer\pgfcorep
atterns.code.tex
File: pgfcorepatterns.code.tex 2013/11/07  (rcs-revision 1.5)
)))
(C:\Users\Mateus\AppData\Roaming\MiKTeX\2.9\tex\generic\pgf\modules\pgfmodulesh
apes.code.tex
File: pgfmoduleshapes.code.tex 2014/03/21  (rcs-revision 1.35)
\pgfnodeparttextbox=\box42
)
(C:\Users\Mateus\AppData\Roaming\MiKTeX\2.9\tex\generic\pgf\modules\pgfmodulepl
ot.code.tex
File: pgfmoduleplot.code.tex 2015/08/03  (rcs-revision 1.13)
)
(C:\Users\Mateus\AppData\Roaming\MiKTeX\2.9\tex\latex\pgf\compatibility\pgfcomp
-version-0-65.sty
Package: pgfcomp-version-0-65 2007/07/03 v3.0.1a (rcs-revision 1.7)
\pgf@nodesepstart=\dimen185
\pgf@nodesepend=\dimen186
)
(C:\Users\Mateus\AppData\Roaming\MiKTeX\2.9\tex\latex\pgf\compatibility\pgfcomp
-version-1-18.sty
Package: pgfcomp-version-1-18 2007/07/23 v3.0.1a (rcs-revision 1.1)
)) (C:\Users\Mateus\AppData\Roaming\MiKTeX\2.9\tex\latex\pgf\utilities\pgffor.s
ty
(C:\Users\Mateus\AppData\Roaming\MiKTeX\2.9\tex\latex\pgf\utilities\pgfkeys.sty

(C:\Users\Mateus\AppData\Roaming\MiKTeX\2.9\tex\generic\pgf\utilities\pgfkeys.c
ode.tex)) (C:\Users\Mateus\AppData\Roaming\MiKTeX\2.9\tex\latex\pgf\math\pgfmat
h.sty
(C:\Users\Mateus\AppData\Roaming\MiKTeX\2.9\tex\generic\pgf\math\pgfmath.code.t
ex))
(C:\Users\Mateus\AppData\Roaming\MiKTeX\2.9\tex\generic\pgf\utilities\pgffor.co
de.tex
Package: pgffor 2013/12/13 v3.0.1a (rcs-revision 1.25)

(C:\Users\Mateus\AppData\Roaming\MiKTeX\2.9\tex\generic\pgf\math\pgfmath.code.t
ex)
\pgffor@iter=\dimen187
\pgffor@skip=\dimen188
\pgffor@stack=\toks47
\pgffor@toks=\toks48
))
(C:\Users\Mateus\AppData\Roaming\MiKTeX\2.9\tex\generic\pgf\frontendlayer\tikz\
tikz.code.tex
Package: tikz 2015/08/07 v3.0.1a (rcs-revision 1.151)

(C:\Users\Mateus\AppData\Roaming\MiKTeX\2.9\tex\generic\pgf\libraries\pgflibrar
yplothandlers.code.tex
File: pgflibraryplothandlers.code.tex 2013/08/31 v3.0.1a (rcs-revision 1.20)
\pgf@plot@mark@count=\count136
\pgfplotmarksize=\dimen189
)
\tikz@lastx=\dimen190
\tikz@lasty=\dimen191
\tikz@lastxsaved=\dimen192
\tikz@lastysaved=\dimen193
\tikzleveldistance=\dimen194
\tikzsiblingdistance=\dimen195
\tikz@figbox=\box43
\tikz@figbox@bg=\box44
\tikz@tempbox=\box45
\tikz@tempbox@bg=\box46
\tikztreelevel=\count137
\tikznumberofchildren=\count138
\tikznumberofcurrentchild=\count139
\tikz@fig@count=\count140

(C:\Users\Mateus\AppData\Roaming\MiKTeX\2.9\tex\generic\pgf\modules\pgfmodulema
trix.code.tex
File: pgfmodulematrix.code.tex 2013/09/17  (rcs-revision 1.8)
\pgfmatrixcurrentrow=\count141
\pgfmatrixcurrentcolumn=\count142
\pgf@matrix@numberofcolumns=\count143
)
\tikz@expandcount=\count144

(C:\Users\Mateus\AppData\Roaming\MiKTeX\2.9\tex\generic\pgf\frontendlayer\tikz\
libraries\tikzlibrarytopaths.code.tex
File: tikzlibrarytopaths.code.tex 2008/06/17 v3.0.1a (rcs-revision 1.2)
)))
(C:\Users\Mateus\AppData\Roaming\MiKTeX\2.9\tex\generic\pgf\frontendlayer\tikz\
libraries\tikzlibrarypositioning.code.tex
File: tikzlibrarypositioning.code.tex 2008/10/06 v3.0.1a (rcs-revision 1.7)
) ("C:\Program Files\MiKTeX 2.9\tex\latex\tools\calc.sty"
Package: calc 2014/10/28 v4.3 Infix arithmetic (KKT,FJ)
\calc@Acount=\count145
\calc@Bcount=\count146
\calc@Adimen=\dimen196
\calc@Bdimen=\dimen197
\calc@Askip=\skip77
\calc@Bskip=\skip78
LaTeX Info: Redefining \setlength on input line 80.
LaTeX Info: Redefining \addtolength on input line 81.
\calc@Ccount=\count147
\calc@Cskip=\skip79
)
\c@@todonotes@numberoftodonotes=\count148
) (C:\Users\Mateus\AppData\Roaming\MiKTeX\2.9\tex\latex\mathtools\mathtools.sty
Package: mathtools 2018/01/08 v1.21 mathematical typesetting tools
(C:\Users\Mateus\AppData\Roaming\MiKTeX\2.9\tex\latex\mathtools\mhsetup.sty
Package: mhsetup 2017/03/31 v1.3 programming setup (MH)
)
LaTeX Info: Thecontrolsequence`\('isalreadyrobust on input line 129.
LaTeX Info: Thecontrolsequence`\)'isalreadyrobust on input line 129.
LaTeX Info: Thecontrolsequence`\['isalreadyrobust on input line 129.
LaTeX Info: Thecontrolsequence`\]'isalreadyrobust on input line 129.
\g_MT_multlinerow_int=\count149
\l_MT_multwidth_dim=\dimen198
\origjot=\skip80
\l_MT_shortvdotswithinadjustabove_dim=\dimen199
\l_MT_shortvdotswithinadjustbelow_dim=\dimen256
\l_MT_above_intertext_sep=\dimen257
\l_MT_below_intertext_sep=\dimen258
\l_MT_above_shortintertext_sep=\dimen259
\l_MT_below_shortintertext_sep=\dimen260
)
\c@theorem=\count150
\c@conjectureBold=\count151
) (icml2021.sty
Package: icml2021 2020/11/18 v2.0 ICML Conference Style File
("C:\Program Files\MiKTeX 2.9\tex\latex\psnfss\times.sty"
Package: times 2005/04/12 PSNFSS-v9.2a (SPQR) 
) (fancyhdr.sty
\fancy@headwidth=\skip81
\f@ncyO@elh=\skip82
\f@ncyO@erh=\skip83
\f@ncyO@olh=\skip84
\f@ncyO@orh=\skip85
\f@ncyO@elf=\skip86
\f@ncyO@erf=\skip87
\f@ncyO@olf=\skip88
\f@ncyO@orf=\skip89
) (algorithm.sty
Package: algorithm 
Document Style `algorithm' - floating environment
("C:\Program Files\MiKTeX 2.9\tex\latex\float\float.sty"
Package: float 2001/11/08 v1.3d Float enhancements (AL)
\c@float@type=\count152
\float@exts=\toks49
\float@box=\box47
\@float@everytoks=\toks50
\@floatcapt=\box48
)
\@float@every@algorithm=\toks51
\c@algorithm=\count153
) (algorithmic.sty
Package: algorithmic 
Document Style `algorithmic' - environment
\c@ALC@line=\count154
\c@ALC@rem=\count155
\ALC@tlm=\skip90
) (C:\Users\Mateus\AppData\Roaming\MiKTeX\2.9\tex\latex\natbib\natbib.sty
Package: natbib 2010/09/13 8.31b (PWD, AO)
\bibhang=\skip91
\bibsep=\skip92
LaTeX Info: Redefining \cite on input line 694.
\c@NAT@ctr=\count156
) (C:\Users\Mateus\AppData\Roaming\MiKTeX\2.9\tex\latex\eso-pic\eso-pic.sty
Package: eso-pic 2018/04/12 v2.0h eso-pic (RN)
) (C:\Users\Mateus\AppData\Roaming\MiKTeX\2.9\tex\latex\forloop\forloop.sty
Package: forloop 2006/09/18 v3.0 For Loops for LaTeX
)
Package hyperref Info: Option `colorlinks' set `true' on input line 108.
\titrun=\box49
\c@@affiliationcounter=\count157
\c@@affilnum=\count158
\newcaptionbox=\box50
\newcaptionboxwid=\dimen261
\icmlrulerbox=\box51
\icmlrulercount=\count159
\icmlruleroffset=\dimen262
\cv@lineheight=\dimen263
\cv@boxheight=\dimen264
\cv@tmpbox=\box52
\cv@refno=\count160
\cv@tot=\count161
\cv@tmpc@=\count162
\cv@tmpc=\count163
) (learningBPs.aux

LaTeX Warning: Label `equation:rightmultiplication' multiply defined.


LaTeX Warning: Label `proposition:FastComputation' multiply defined.

)
\openout1 = `learningBPs.aux'.

LaTeX Font Info:    Checking defaults for OML/cmm/m/it on input line 65.
LaTeX Font Info:    ... okay on input line 65.
LaTeX Font Info:    Checking defaults for T1/cmr/m/n on input line 65.
LaTeX Font Info:    ... okay on input line 65.
LaTeX Font Info:    Checking defaults for OT1/cmr/m/n on input line 65.
LaTeX Font Info:    ... okay on input line 65.
LaTeX Font Info:    Checking defaults for OMS/cmsy/m/n on input line 65.
LaTeX Font Info:    ... okay on input line 65.
LaTeX Font Info:    Checking defaults for OMX/cmex/m/n on input line 65.
LaTeX Font Info:    ... okay on input line 65.
LaTeX Font Info:    Checking defaults for U/cmr/m/n on input line 65.
LaTeX Font Info:    ... okay on input line 65.
LaTeX Font Info:    Checking defaults for PD1/pdf/m/n on input line 65.
LaTeX Font Info:    ... okay on input line 65.
LaTeX Font Info:    Try loading font information for OT1+ptm on input line 65.
("C:\Program Files\MiKTeX 2.9\tex\latex\psnfss\ot1ptm.fd"
File: ot1ptm.fd 2001/06/04 font definitions for OT1/ptm.
)
LaTeX Info: Redefining \microtypecontext on input line 65.
Package microtype Info: Generating PDF output.
Package microtype Info: Character protrusion enabled (level 2).
Package microtype Info: Using default protrusion set `alltext'.
Package microtype Info: Automatic font expansion enabled (level 2),
(microtype)             stretch: 20, shrink: 20, step: 1, non-selected.
Package microtype Info: Using default expansion set `basictext'.
Package microtype Info: No adjustment of tracking.
Package microtype Info: No adjustment of interword spacing.
Package microtype Info: No adjustment of character kerning.
(C:\Users\Mateus\AppData\Roaming\MiKTeX\2.9\tex\latex\microtype\mt-ptm.cfg
File: mt-ptm.cfg 2006/04/20 v1.7 microtype config. file: Times (RS)
) (C:\Users\Mateus\AppData\Roaming\MiKTeX\2.9\tex\context\base\supp-pdf.mkii
[Loading MPS to PDF converter (version 2006.09.02).]
\scratchcounter=\count164
\scratchdimen=\dimen265
\scratchbox=\box53
\nofMPsegments=\count165
\nofMParguments=\count166
\everyMPshowfont=\toks52
\MPscratchCnt=\count167
\MPscratchDim=\dimen266
\MPnumerator=\count168
\makeMPintoPDFobject=\count169
\everyMPtoPDFconversion=\toks53
) ("C:\Program Files\MiKTeX 2.9\tex\latex\oberdiek\epstopdf-base.sty"
Package: epstopdf-base 2016/05/15 v2.6 Base part for package epstopdf
("C:\Program Files\MiKTeX 2.9\tex\latex\oberdiek\grfext.sty"
Package: grfext 2016/05/16 v1.2 Manage graphics extensions (HO)
)
Package epstopdf-base Info: Redefining graphics rule for `.eps' on input line 4
38.
Package grfext Info: Graphics extension search list:
(grfext)             [.pdf,.png,.jpg,.mps,.jpeg,.jbig2,.jb2,.PDF,.PNG,.JPG,.JPE
G,.JBIG2,.JB2,.eps]
(grfext)             \AppendGraphicsExtensions on input line 456.
)
\AtBeginShipoutBox=\box54
Package hyperref Info: Link coloring ON on input line 65.
("C:\Program Files\MiKTeX 2.9\tex\latex\hyperref\nameref.sty"
Package: nameref 2016/05/21 v2.44 Cross-referencing by name of section
("C:\Program Files\MiKTeX 2.9\tex\generic\oberdiek\gettitlestring.sty"
Package: gettitlestring 2016/05/16 v1.5 Cleanup title references (HO)
)
\c@section@level=\count170
)
LaTeX Info: Redefining \ref on input line 65.
LaTeX Info: Redefining \pageref on input line 65.
LaTeX Info: Redefining \nameref on input line 65.
(learningBPs.out) (learningBPs.out)
\@outlinefile=\write4
\openout4 = `learningBPs.out'.

Package caption Info: Begin \AtBeginDocument code.
Package caption Info: float package is loaded.
Package caption Info: End \AtBeginDocument code.
ABD: EveryShipout initializing macros
LaTeX Font Info:    Font shape `OT1/ptm/bx/n' in size <9> not available
(Font)              Font shape `OT1/ptm/b/n' tried instead on input line 134.
LaTeX Font Info:    Font shape `OT1/ptm/bx/n' in size <14.4> not available
(Font)              Font shape `OT1/ptm/b/n' tried instead on input line 134.
LaTeX Font Info:    Font shape `OT1/ptm/bx/n' in size <10> not available
(Font)              Font shape `OT1/ptm/b/n' tried instead on input line 134.
\c@@affilusp=\count171
(C:\Users\Mateus\AppData\Roaming\MiKTeX\2.9\tex\latex\microtype\mt-cmr.cfg
File: mt-cmr.cfg 2013/05/19 v2.2 microtype config. file: Computer Modern Roman 
(RS)
)
LaTeX Font Info:    Try loading font information for U+msa on input line 134.
("C:\Program Files\MiKTeX 2.9\tex\latex\amsfonts\umsa.fd"
File: umsa.fd 2013/01/14 v3.01 AMS symbols A
) (C:\Users\Mateus\AppData\Roaming\MiKTeX\2.9\tex\latex\microtype\mt-msa.cfg
File: mt-msa.cfg 2006/02/04 v1.1 microtype config. file: AMS symbols (a) (RS)
)
LaTeX Font Info:    Try loading font information for U+msb on input line 134.
("C:\Program Files\MiKTeX 2.9\tex\latex\amsfonts\umsb.fd"
File: umsb.fd 2013/01/14 v3.01 AMS symbols B
) (C:\Users\Mateus\AppData\Roaming\MiKTeX\2.9\tex\latex\microtype\mt-msb.cfg
File: mt-msb.cfg 2005/06/01 v1.0 microtype config. file: AMS symbols (b) (RS)
)
LaTeX Font Info:    Try loading font information for U+stmry on input line 134.

(C:\Users\Mateus\AppData\Roaming\MiKTeX\2.9\tex\latex\stmaryrd\ustmry.fd)
\c@@affilchalmers=\count172
\c@@affilbergen=\count173

Package hyperref Warning: Ignoring empty anchor on input line 144.

LaTeX Font Info:    Try loading font information for OML+ptm on input line 144.

("C:\Program Files\MiKTeX 2.9\tex\latex\psnfss\omlptm.fd"
File: omlptm.fd 
)
LaTeX Font Info:    Font shape `OML/ptm/m/n' in size <9> not available
(Font)              Font shape `OML/cmm/m/it' tried instead on input line 144.
(00-Abstract.tex
LaTeX Font Info:    Font shape `OT1/ptm/bx/n' in size <12> not available
(Font)              Font shape `OT1/ptm/b/n' tried instead on input line 2.
) (01-Introduction.tex
Underfull \vbox (badness 10000) has occurred while \output is active []

[1{C:/Users/Mateus/AppData/Local/MiKTeX/2.9/pdftex/config/pdftex.map}


]) (02-Preliminaries.tex
Package microtype Info: Loading generic protrusion settings for font family
(microtype)             `cmss' (encoding: OT1).
(microtype)             For optimal results, create family-specific settings.
(microtype)             See the microtype manual for details.
[2]) (03-Model.tex [3] [4]
Overfull \hbox (2.24008pt too wide) detected at line 195
\OML/cmm/m/it/10 f[]\OT1/cmr/m/n/10 (\OML/cmm/m/it/10 z\OT1/cmr/m/n/10 ) = [][]

 []


Overfull \hbox (8.05591pt too wide) detected at line 217
\OML/cmm/m/it/10 g[]\OT1/cmr/m/n/10 (\OML/cmm/m/it/10 z\OT1/cmr/m/n/10 ) = [][]

 []

LaTeX Font Info:    Try loading font information for OMS+ptm on input line 256.

("C:\Program Files\MiKTeX 2.9\tex\latex\psnfss\omsptm.fd"
File: omsptm.fd 
)
LaTeX Font Info:    Font shape `OMS/ptm/m/it' in size <10> not available
(Font)              Font shape `OMS/cmsy/m/n' tried instead on input line 256.

Underfull \hbox (badness 1308) in paragraph at lines 264--271
[]\OT1/ptm/m/n/10 (+20) Let $\OML/cmm/m/it/10 D \OT1/cmr/m/n/10 = (\OML/cmm/m/i
t/10 D[]; [] ; D[]\OT1/cmr/m/n/10 )$ \OT1/ptm/m/n/10 (+20) be a dataset, and $\
OML/cmm/m/it/10 B$ \OT1/ptm/m/n/10 (+20) be a
 []


Underfull \hbox (badness 1859) in paragraph at lines 264--271
\OML/cmm/m/it/10 k$\OT1/ptm/m/n/10 (+20) -dimensional branch-ing pro-gram of le
ngth $\OML/cmm/m/it/10 l$\OT1/ptm/m/n/10 (+20) . Let
 []


Underfull \hbox (badness 2229) in paragraph at lines 264--271
\OML/cmm/m/it/10 L \OT1/cmr/m/n/10 = (\OML/cmm/m/it/10 f[]; [] ; f[]\OT1/cmr/m/
n/10 )$ \OT1/ptm/m/n/10 (+20) and $\OML/cmm/m/it/10 R \OT1/cmr/m/n/10 = (\OML/c
mm/m/it/10 g[]; [] ; g[]\OT1/cmr/m/n/10 )$ \OT1/ptm/m/n/10 (+20) be pre-
 []

[5]) (05-QuadraticLowerBound.tex [6]) (04-GappedLearning.tex [7]
Underfull \hbox (badness 10000) in paragraph at lines 92--100
[]\OT1/ptm/m/n/10 (+20) An ex-am-ple of func-tion with best-partition non-
 []


Underfull \hbox (badness 1789) in paragraph at lines 92--100
\OT1/ptm/m/n/10 (+20) deterministic com-mu-ni-ca-tion com-plex-ity $\OT1/cmr/m/
n/10 
(\OML/cmm/m/it/10 n\OT1/cmr/m/n/10 )$ \OT1/ptm/m/n/10 (+20) is the
 []

) (04-Experiments.tex
Package epstopdf Info: Source file: <PlotSheets/Time_d_3_mi_10.eps>
(epstopdf)                    date: 2021-06-11 14:26:54
(epstopdf)                    size: 78422 bytes
(epstopdf)             Output file: <PlotSheets/Time_d_3_mi_10-eps-converted-to
.pdf>
(epstopdf)                    date: 2021-06-11 14:28:32
(epstopdf)                    size: 34716 bytes
(epstopdf)             Command: <epstopdf --outfile=PlotSheets/Time_d_3_mi_10-e
ps-converted-to.pdf PlotSheets/Time_d_3_mi_10.eps>
(epstopdf)             \includegraphics on input line 13.
Package epstopdf Info: Output file is already uptodate.
<PlotSheets/Time_d_3_mi_10-eps-converted-to.pdf, id=206, 462.72874pt x 347.2975
pt>
File: PlotSheets/Time_d_3_mi_10-eps-converted-to.pdf Graphic file (type pdf)
<use PlotSheets/Time_d_3_mi_10-eps-converted-to.pdf>
Package pdftex.def Info: PlotSheets/Time_d_3_mi_10-eps-converted-to.pdf  used o
n input line 13.
(pdftex.def)             Requested size: 243.91124pt x 183.06522pt.

Overfull \hbox (9.03374pt too wide) in paragraph at lines 13--21
 [][] 
 []

) (Conclusion.tex
Underfull \vbox (badness 4846) has occurred while \output is active []

[8 <./PlotSheets/Time_d_3_mi_10-eps-converted-to.pdf>]) (learningBPs.bbl [9]) [
10]
Package atveryend Info: Empty hook `BeforeClearDocument' on input line 176.
Package atveryend Info: Empty hook `AfterLastShipout' on input line 176.
(learningBPs.aux)
Package atveryend Info: Executing hook `AtVeryEndDocument' on input line 176.
Package atveryend Info: Executing hook `AtEndAfterFileList' on input line 176.
Package rerunfilecheck Info: File `learningBPs.out' has not changed.
(rerunfilecheck)             Checksum: D41D8CD98F00B204E9800998ECF8427E;0.

LaTeX Warning: There were multiply-defined labels.

Package atveryend Info: Empty hook `AtVeryVeryEnd' on input line 176.
 ) 
Here is how much of TeX's memory you used:
 23052 strings out of 493305
 417446 string characters out of 3138871
 527102 words of memory out of 3000000
 25791 multiletter control sequences out of 15000+200000
 45722 words of font info for 243 fonts, out of 3000000 for 9000
 1141 hyphenation exceptions out of 8191
 64i,14n,56p,1065b,516s stack positions out of 5000i,500n,10000p,200000b,50000s
{C:/Program Files/MiKTeX 2.9/fonts/enc/dvips/base/8r.enc}<C:/Program Files/Mi
KTeX 2.9/fonts/type1/public/amsfonts/cm/cmbx10.pfb><C:/Program Files/MiKTeX 2.9
/fonts/type1/public/amsfonts/cm/cmex10.pfb><C:/Program Files/MiKTeX 2.9/fonts/t
ype1/public/amsfonts/cm/cmmi10.pfb><C:/Program Files/MiKTeX 2.9/fonts/type1/pub
lic/amsfonts/cm/cmmi5.pfb><C:/Program Files/MiKTeX 2.9/fonts/type1/public/amsfo
nts/cm/cmmi6.pfb><C:/Program Files/MiKTeX 2.9/fonts/type1/public/amsfonts/cm/cm
mi7.pfb><C:/Program Files/MiKTeX 2.9/fonts/type1/public/amsfonts/cm/cmmi9.pfb><
C:/Program Files/MiKTeX 2.9/fonts/type1/public/amsfonts/cm/cmr10.pfb><C:/Progra
m Files/MiKTeX 2.9/fonts/type1/public/amsfonts/cm/cmr5.pfb><C:/Program Files/Mi
KTeX 2.9/fonts/type1/public/amsfonts/cm/cmr6.pfb><C:/Program Files/MiKTeX 2.9/f
onts/type1/public/amsfonts/cm/cmr7.pfb><C:/Program Files/MiKTeX 2.9/fonts/type1
/public/amsfonts/cm/cmr9.pfb><C:/Program Files/MiKTeX 2.9/fonts/type1/public/am
sfonts/cm/cmss10.pfb><C:/Program Files/MiKTeX 2.9/fonts/type1/public/amsfonts/c
m/cmsy10.pfb><C:/Program Files/MiKTeX 2.9/fonts/type1/public/amsfonts/cm/cmsy5.
pfb><C:/Program Files/MiKTeX 2.9/fonts/type1/public/amsfonts/cm/cmsy6.pfb><C:/P
rogram Files/MiKTeX 2.9/fonts/type1/public/amsfonts/cm/cmsy7.pfb><C:/Program Fi
les/MiKTeX 2.9/fonts/type1/public/amsfonts/cm/cmsy9.pfb><C:/Program Files/MiKTe
X 2.9/fonts/type1/public/amsfonts/cm/cmti10.pfb><C:/Program Files/MiKTeX 2.9/fo
nts/type1/public/amsfonts/cm/cmti9.pfb><C:/Program Files/MiKTeX 2.9/fonts/type1
/public/amsfonts/symbols/msbm10.pfb><C:/Users/Mateus/AppData/Roaming/MiKTeX/2.9
/fonts/type1/public/hoekwater/stmary10.pfb><C:/Users/Mateus/AppData/Roaming/MiK
TeX/2.9/fonts/type1/public/hoekwater/stmary7.pfb><C:/Program Files/MiKTeX 2.9/f
onts/type1/urw/times/utmb8a.pfb><C:/Program Files/MiKTeX 2.9/fonts/type1/urw/ti
mes/utmr8a.pfb><C:/Program Files/MiKTeX 2.9/fonts/type1/urw/times/utmr8a.pfb><C
:/Program Files/MiKTeX 2.9/fonts/type1/urw/times/utmri8a.pfb>
Output written on learningBPs.pdf (10 pages, 402906 bytes).
PDF statistics:
 338 PDF objects out of 1000 (max. 8388607)
 73 named destinations out of 1000 (max. 500000)
 36370 words of extra memory for PDF output out of 42996 (max. 10000000)
