# Supplementary material
Source: ML conference proceedings conference paper supplement (https://proceedings.mlr.press/v139/andino21a.html)
Supplement: Supplementary file 1 [file andino21a-supp.zip › learningUnitaryBPs-ICML-FinalVersion/Makefile]

all:
	pdflatex -silent learningBPs.tex
	bibtex -silent learningBPs.aux
	pdflatex -silent learningBPs.tex
	pdflatex -silent learningBPs.tex
	sumatrapdf learningBPs.pdf

linux: 
	pdflatex -silent learningBPs.tex
	bibtex learningBPs.aux
	pdflatex -silent learningBPs.tex
	pdflatex -silent learningBPs.tex
	evince learningBPs.pdf
