# Supplementary material
Source: ML conference proceedings conference paper supplement (https://proceedings.mlr.press/v139/andino21a.html)

Number of Accepted Papers

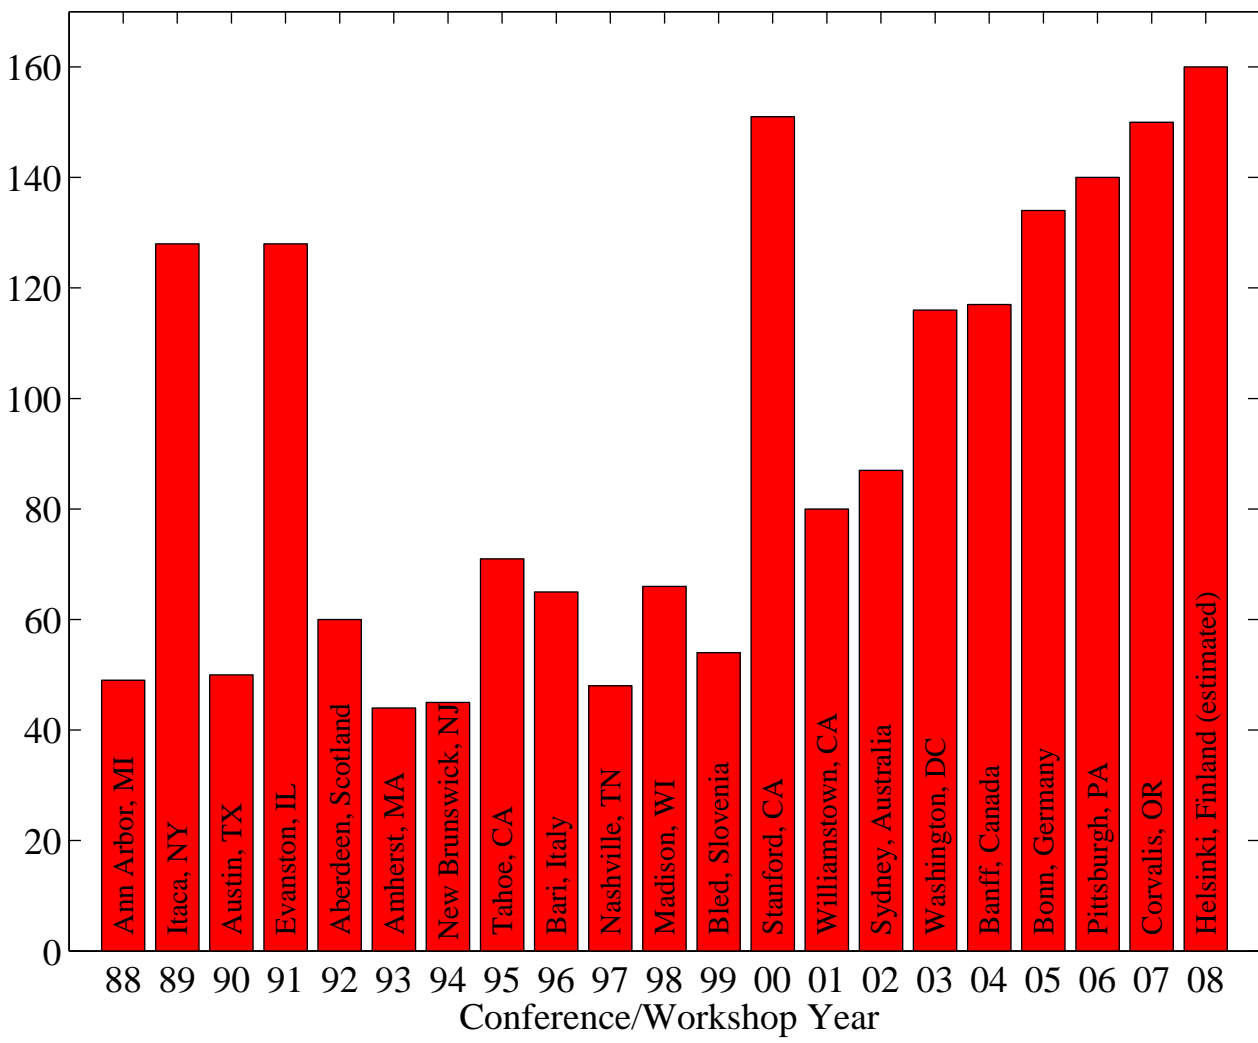

Supplement: Supplementary file 1 [file andino21a-supp.zip › learningUnitaryBPs-ICML-FinalVersion/icml_numpapers.pdf]

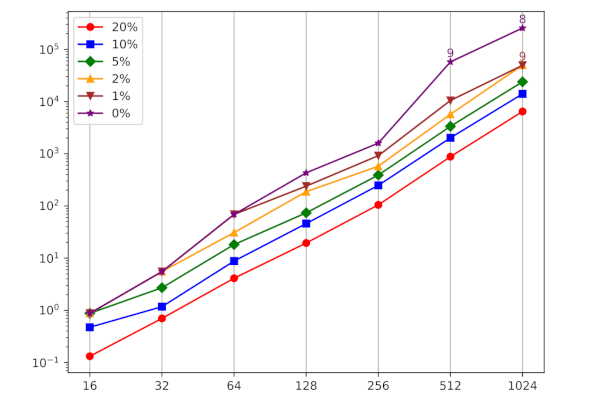

Supplement: Supplementary file 1 [file andino21a-supp.zip › learningUnitaryBPs-ICML-FinalVersion/PlotSheets/imageDescribingPaper.png]

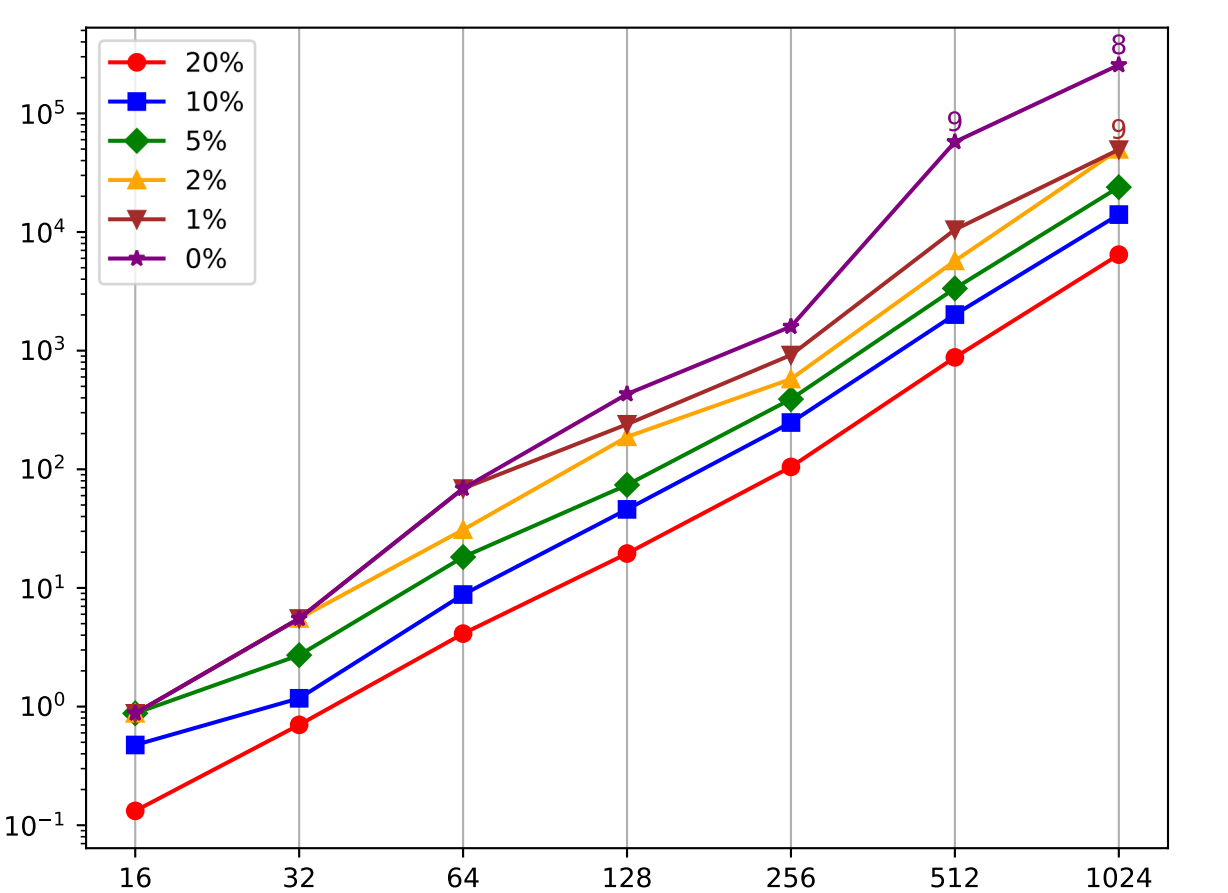

Supplement: Supplementary file 1 [file andino21a-supp.zip › learningUnitaryBPs-ICML-FinalVersion/PlotSheets/Time_d_3_mi_10-eps-converted-to.pdf]

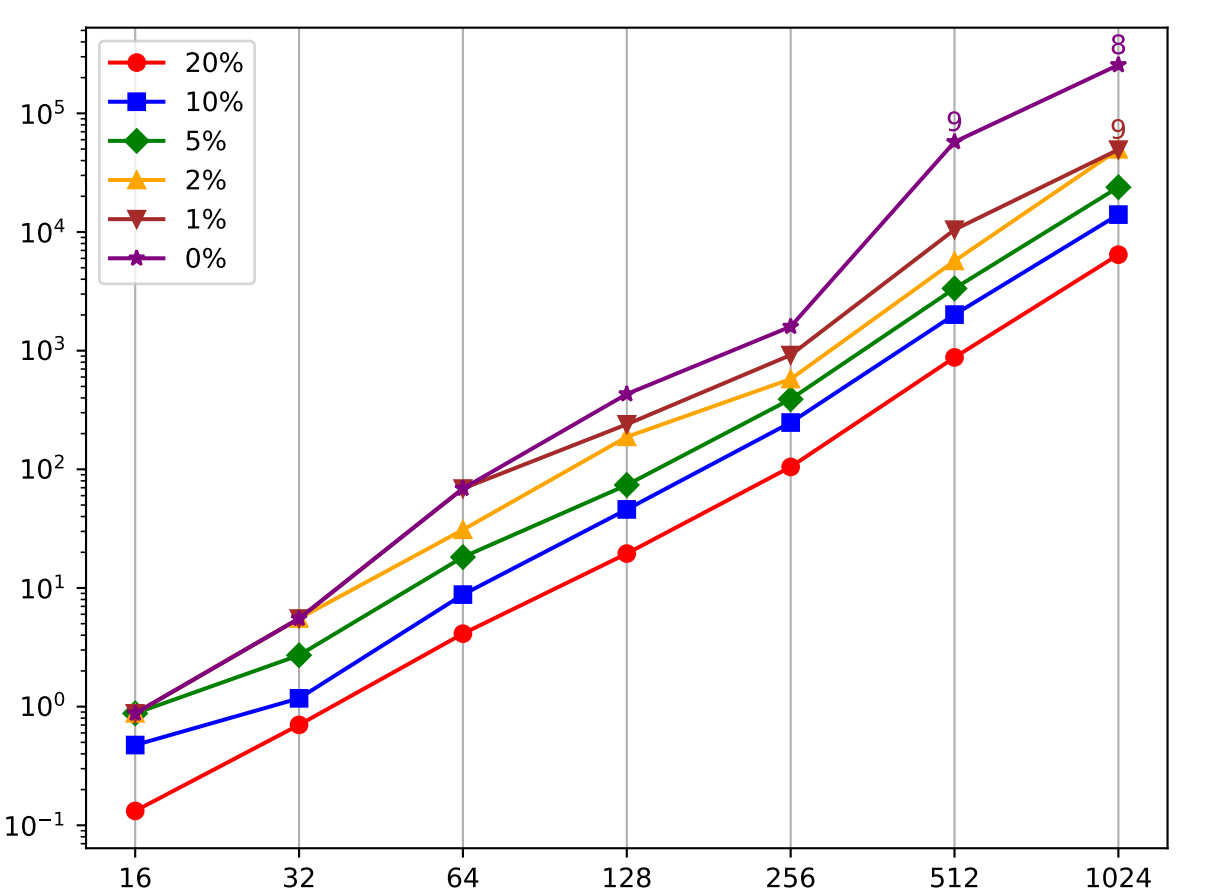

Supplement: Supplementary file 1 [file andino21a-supp.zip › learningUnitaryBPs-ICML-FinalVersion/PlotSheets/Time_d_3_mi_10-OLD.pdf]
